# Supplementary material for: Symmetrical bis(fulvene) chromophores: model compounds for acceptor–donor–acceptor dye architectures
Source: Royal Society of Chemistry journal article supplement (doi:10.1039/c4ra07738e), 2014-01-01
Supplement: c4ra07738e1.pdf [file c4ra07738e1.pdf]

## SUPPORTING INFORMATION

### **Symmetrical Bis(fulvene) Chromophores: Model Compounds for Acceptor-Donor-Acceptor Dye Architectures**

Endrit Shurdha,<sup>†</sup> Brianne K. Repasy,<sup>‡</sup> Hannah A. Miller,<sup>†</sup> Kelsey Dees,<sup>†</sup>  
David W. Ball,<sup>‡</sup> Scott T. Iacono<sup>†</sup> and Gary J. Balaich<sup>\*†</sup>

<sup>†</sup>Department of Chemistry and Chemistry Research Center, 2355 Fairchild Drive Suite 2N225,  
United States Air Force Academy, Colorado Springs, CO 80840

<sup>‡</sup>Department of Chemistry, Cleveland State University, 2121 Euclid Avenue, Cleveland OH 44115

Correspondence e-mail: [scott.iacono@usafa.edu](mailto:scott.iacono@usafa.edu) or [gary.balaich@usafa.edu](mailto:gary.balaich@usafa.edu)

# Table of Contents

| <u>Description</u>                                                                                   | <u>Page Number</u> |
|------------------------------------------------------------------------------------------------------|--------------------|
| Synthesis of bis(fulvenes) <b>1-4</b> (experimental)                                                 | 3-4                |
| NMR spectra                                                                                          | 5-12               |
| Figure S1 - 400 MHz <sup>1</sup> H NMR spectrum of bis(fulvene) <b>1</b>                             | 5                  |
| Figure S2 - 100 MHz <sup>13</sup> C NMR spectrum of bis(fulvene) <b>1</b>                            | 6                  |
| Figure S3 - 400 MHz <sup>1</sup> H NMR spectrum of bis(fulvene) <b>2</b>                             | 7                  |
| Figure S4 - 100 MHz <sup>13</sup> C NMR spectrum of bis(fulvene) <b>2</b>                            | 8                  |
| Figure S5 - 400 MHz <sup>1</sup> H NMR spectrum of bis(fulvene) <b>3</b>                             | 9                  |
| Figure S6 - 100 MHz <sup>13</sup> C NMR spectrum of bis(fulvene) <b>3</b>                            | 10                 |
| Figure S7 - 400 MHz <sup>1</sup> H NMR spectrum of bis(fulvene) <b>4</b>                             | 11                 |
| Figure S8 - 100 MHz <sup>13</sup> C NMR spectrum of bis(fulvene) <b>4</b>                            | 12                 |
| X-ray crystallographic data for bis(fulvene) <b>3</b>                                                | 13-40              |
| Figure S9 – thermal ellipsoid view of bis(fulvene) <b>3</b> with all atoms labeled                   | 13                 |
| Table S1 – sample and crystal data for bis(fulvene) <b>3</b>                                         | 14                 |
| Figure S10 – thermal ellipsoid view of bis(fulvene) <b>3</b> with selected bond distances and angles | 15                 |
| Figure S11 – packing view of bis(fulvene) <b>3</b> , view along the a-axis direction                 | 16                 |
| Figure S12 – packing view of bis(fulvene) <b>3</b> , view perpendicular to the a-axis direction      | 17                 |
| Crystallographic tables (Tables S2 – S7)                                                             | 18-40              |
| Computational Methods and Results                                                                    | 41-49              |
| Table S8 – Comparison of calculated and experimental data (UV-Vis) for bis(fulvenes) <b>1-4</b>      | 41                 |
| Figures S13 – S16, calculated UV-Vis data for bis(fulvenes) <b>1-4</b>                               | 42-45              |
| Figures S17 – S20, HOMO-LUMO plots of bis(fulvenes) <b>1-4</b>                                       | 46-49              |
| References                                                                                           | 50                 |

## Experimental

**General.** All solvents, starting materials and reagents were purchased from either Aldrich Chemical Co. or TCI America as reagent grade or higher quality and used as received. Literature procedures were used to prepare 9,9-dioctylfluorene-2,7-dicarboxaldehyde,<sup>1</sup> 2,5-bis(hexyloxy)terephthalaldehyde,<sup>2</sup> 2,2'-bithiophene-5,5'-dicarbaldehyde,<sup>3</sup> and 1,3-diphenylcyclopentadiene.<sup>4</sup> Premium grade silica gel used for column chromatography was purchased from Sorbent Technologies (60Å, 40-63 μm (230X400 Mesh)). All <sup>1</sup>H and <sup>13</sup>C NMR spectra were obtained under ambient conditions using an Agilent Technologies 400 MHz instrument. Proton and <sup>13</sup>C NMR spectra were referenced using the peak for TMS (0.03%, δ = 0, <sup>1</sup>H) or the peak for CDCl<sub>3</sub> (δ = 77.0, <sup>13</sup>C). High resolution MS data was obtained using an Agilent Technologies LCMS-TOF with reserpine as an internal standard. UV-Vis spectra were obtained under ambient conditions using quartz cells and a Cary-50 UV-Vis spectrophotometer. Single crystal X-ray diffraction data for bis(fulvene) **3** was obtained at 100 K using a Bruker SMART APEX CCD diffractometer. For details of the single crystal X-ray diffraction study, see pages 13-40 below.

**Bis(fulvene) 1.** A mixture of 1,3-diphenylcyclopentadiene (1.00 g, 4.58 mmol) and terephthalaldehyde (0.31 g, 2.27 mmol) were combined in MeOH (20 mL). Pyrrolidine (0.57 mL, 6.94 mmol) was added and the resulting slurry stirred at room temperature for 16 hours. A brown precipitate was recovered by vacuum filtration, washed with 10 mL of cold MeOH, and vacuum dried to give **1** as a crude brown solid. Purification was achieved with flash column chromatography using hexanes (to remove a small amount of unreacted diphenylcyclopentadiene), followed by elution with 20% ethyl acetate/hexanes to give **1** as a brown solid (0.99 g, 81%). The brown solid was crystallized from 50/50 C<sub>6</sub>H<sub>6</sub>/MeOH to give **1** as a crystalline brown solid (0.43 g, 35%). Mp: 200-201° C. <sup>1</sup>H NMR (400 MHz, CDCl<sub>3</sub>): δ 7.19-7.69 (overlapping m, 26 H, PhH and exocyclic fulvene-CH); 7.03, 6.96 (broad m, 4 H, fulvene-CH). Selected <sup>13</sup>C NMR (100 MHz, CDCl<sub>3</sub>) δ 147.3, 145.0, 141.7, 137.8, 137.3, 135.8, 135.1, 131.0, 129.4, 128.7, 128.5, 128.3, 128.1, 127.1, 126.2, 114.2 (C and CH). LC-TOF MS (APCI) m/z: [M+H]<sup>+</sup> calcd for C<sub>42</sub>H<sub>30</sub>, 535.2420; found, 535.2418.

**Bis(fulvene) 2.** Crude **2** was obtained as an orange solid (0.86 g, 89%) using a similar procedure to that used for the synthesis of **1**, except using 1,3-diphenylcyclopentadiene (0.50 g, 2.29 mmol), 9,9-dioctyl-9H-fluorene-3,6-dicarbaldehyde (0.51 g, 1.14 mmol) and pyrrolidine (0.30 mL, 3.65 mmol) and sonicating the reaction mixture at room temperature for 16 hours. Flash column chromatography (same method as for **1**) gave **2** as an orange solid (0.54 g, 56%). Crystalline **2** was also obtained from 50/50 C<sub>6</sub>H<sub>6</sub>/MeOH (0.15 g, 15%). Mp: 138-139 °C. <sup>1</sup>H NMR (400 MHz, CDCl<sub>3</sub>) δ 7.30-7.82 (overlapping m, 28 H, PhH and exocyclic fulvene-CH); 7.09, 7.03 (broad m, 4 H, fulvene-CH); 2.06 (m, 4 H, octyl-CCH<sub>2</sub>); 1.18, 1.10 (overlapping m, 20 H, octyl-CH<sub>2</sub>); 0.78, 0.74 (t, overlapping with m, 10 H, octyl-Me and octyl-CH<sub>2</sub>). <sup>13</sup>C NMR (100 MHz, CDCl<sub>3</sub>) δ 151.9, 146.7, 144.0, 141.7, 141.6, 139.2, 136.6, 136.1, 135.3, 130.0, 129.5, 128.7, 128.4, 128.3, 127.9, 127.7, 127.0, 126.1, 125.4, 120.4, 114.6 (Ph, CCH<sub>2</sub>, and fulvene -C and -CH); 55.3, 40.4, 31.7, 30.2, 29.3, 24.0, 22.6, 14.0 (octyl -Me and CH<sub>2</sub>). LC-TOF MS (APCI) m/z: [M+H]<sup>+</sup> calcd for C<sub>65</sub>H<sub>66</sub>, 847.5237; found, 847.5236.

**Bis(fulvene) 3.** Crude **3** was obtained as a black solid (1.56 g, 71%) using a similar procedure to that used for the synthesis of **1**, except using 1,3-diphenylcyclopentadiene (1.30 g, 5.96 mmol), 2,5-bis(hexyloxy)terephthalaldehyde (0.99 g, 2.96 mmol) and pyrrolidine (0.74 ml, 9.01 mmol). Attempts to obtain **3** as a crystalline material using a variety of solvents resulted in a significant loss of yield. However, crystallization of **3** from

50/50 C<sub>6</sub>H<sub>6</sub>/MeOH gave crystals suitable for single crystal X-ray analysis. Flash column chromatography (same method as for **1** and **2**) on remaining crude **3** (0.96 g) gave a black solid (0.54 g, 25 %). Mp: 160-161 °C. <sup>1</sup>H NMR (400 MHz, CDCl<sub>3</sub>): δ 6.95-7.63 (overlapping m, 28 H, PhH and fulvene-CH); 3.96 (t, 4 H, OCH<sub>2</sub>, *J* = 6 Hz); 1.71 (m, 4 H, OCH<sub>2</sub>CH<sub>2</sub>); 1.35, 1.21 (m, 12 H, CH<sub>2</sub>); 0.79 (t, 6 H, Me, *J* = 7 Hz). <sup>13</sup>C NMR (100 MHz, CDCl<sub>3</sub>) δ 152.4, 146.7, 144.1, 141.7, 136.0, 135.3, 134.0, 129.3, 128.7, 128.5, 128.3, 128.0, 127.9, 127.0, 126.1, 115.5, 114.3 (Ph and fulvene-C and -CH); 69.3 (OCH<sub>2</sub>); 31.6, 29.3, 25.8, 22.6, 14.1 (CH<sub>2</sub> and Me). LC-TOF MS (APCI) m/z: [M+H]<sup>+</sup> calcd for C<sub>54</sub>H<sub>54</sub>O<sub>2</sub>, 735.4197; found, 735.4200.

**Bis(fulvene) 4.** Bis(fulvene) **4** was obtained as a dark purple solid (0.50 g, 75%) using a similar procedure to that used for the synthesis of **3**, except using 1,3-diphenylcyclopentadiene (0.47 g, 2.15 mmol), 2,2'-bithiophene-5,5'-dicarbaldehyde (0.24 g, 1.52 mmol) and pyrrolidine (0.30 ml, 3.65 mmol). Analysis (<sup>1</sup>H NMR) indicated >95% purity, and further purification by column chromatography was not carried out. Mp: 215-216 °C. <sup>1</sup>H NMR (400 MHz, CDCl<sub>3</sub>): δ 6.93–7.79 (m, 30 H, PhH, fulvene-H, and bithiophene-H). <sup>13</sup>C NMR (100 MHz, CDCl<sub>3</sub>) δ 146.8, 142.1, 141.9, 141.7, 141.6, 140.8, 135.9, 135.2, 135.1, 129.5, 129.3, 128.5, 128.1, 127.6, 127.1, 126.3, 125.3, 113.1. LC-TOF MS (APCI) m/z: [M+H]<sup>+</sup> calcd for C<sub>44</sub>H<sub>30</sub>S<sub>2</sub>, 623.1862; found, 847.1857.

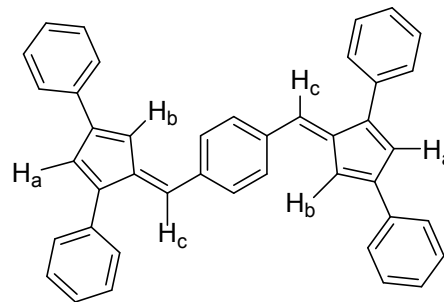

$\delta$  7.19-7.69 (overlapping m, 26 H, PhH and exocyclic fulvene-CH);  
7.03, 6.96 (broad m, 4 H, fulvene-CH)

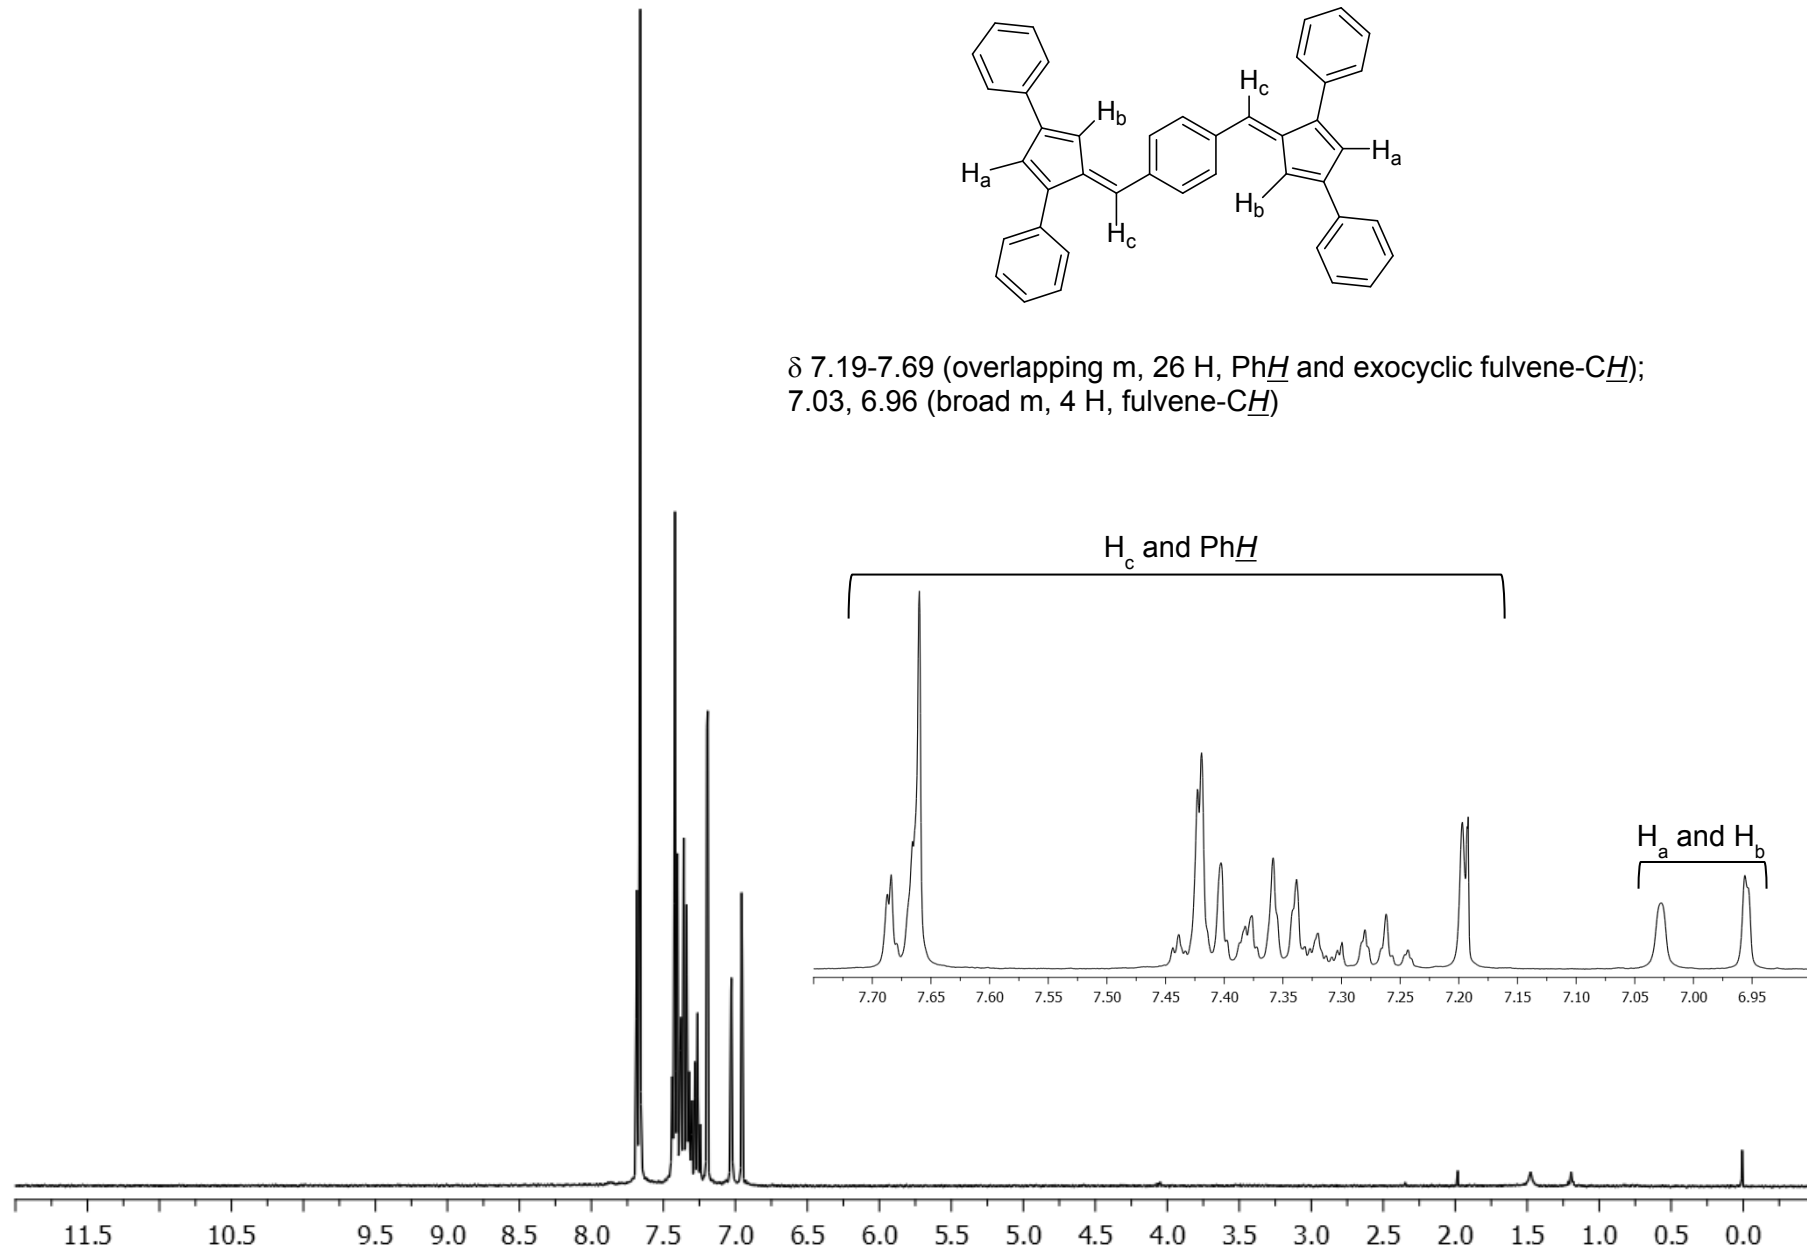

Figure S1. 400 MHz <sup>1</sup>H NMR spectrum of bis(fulvene) 1 in CDCl<sub>3</sub>.

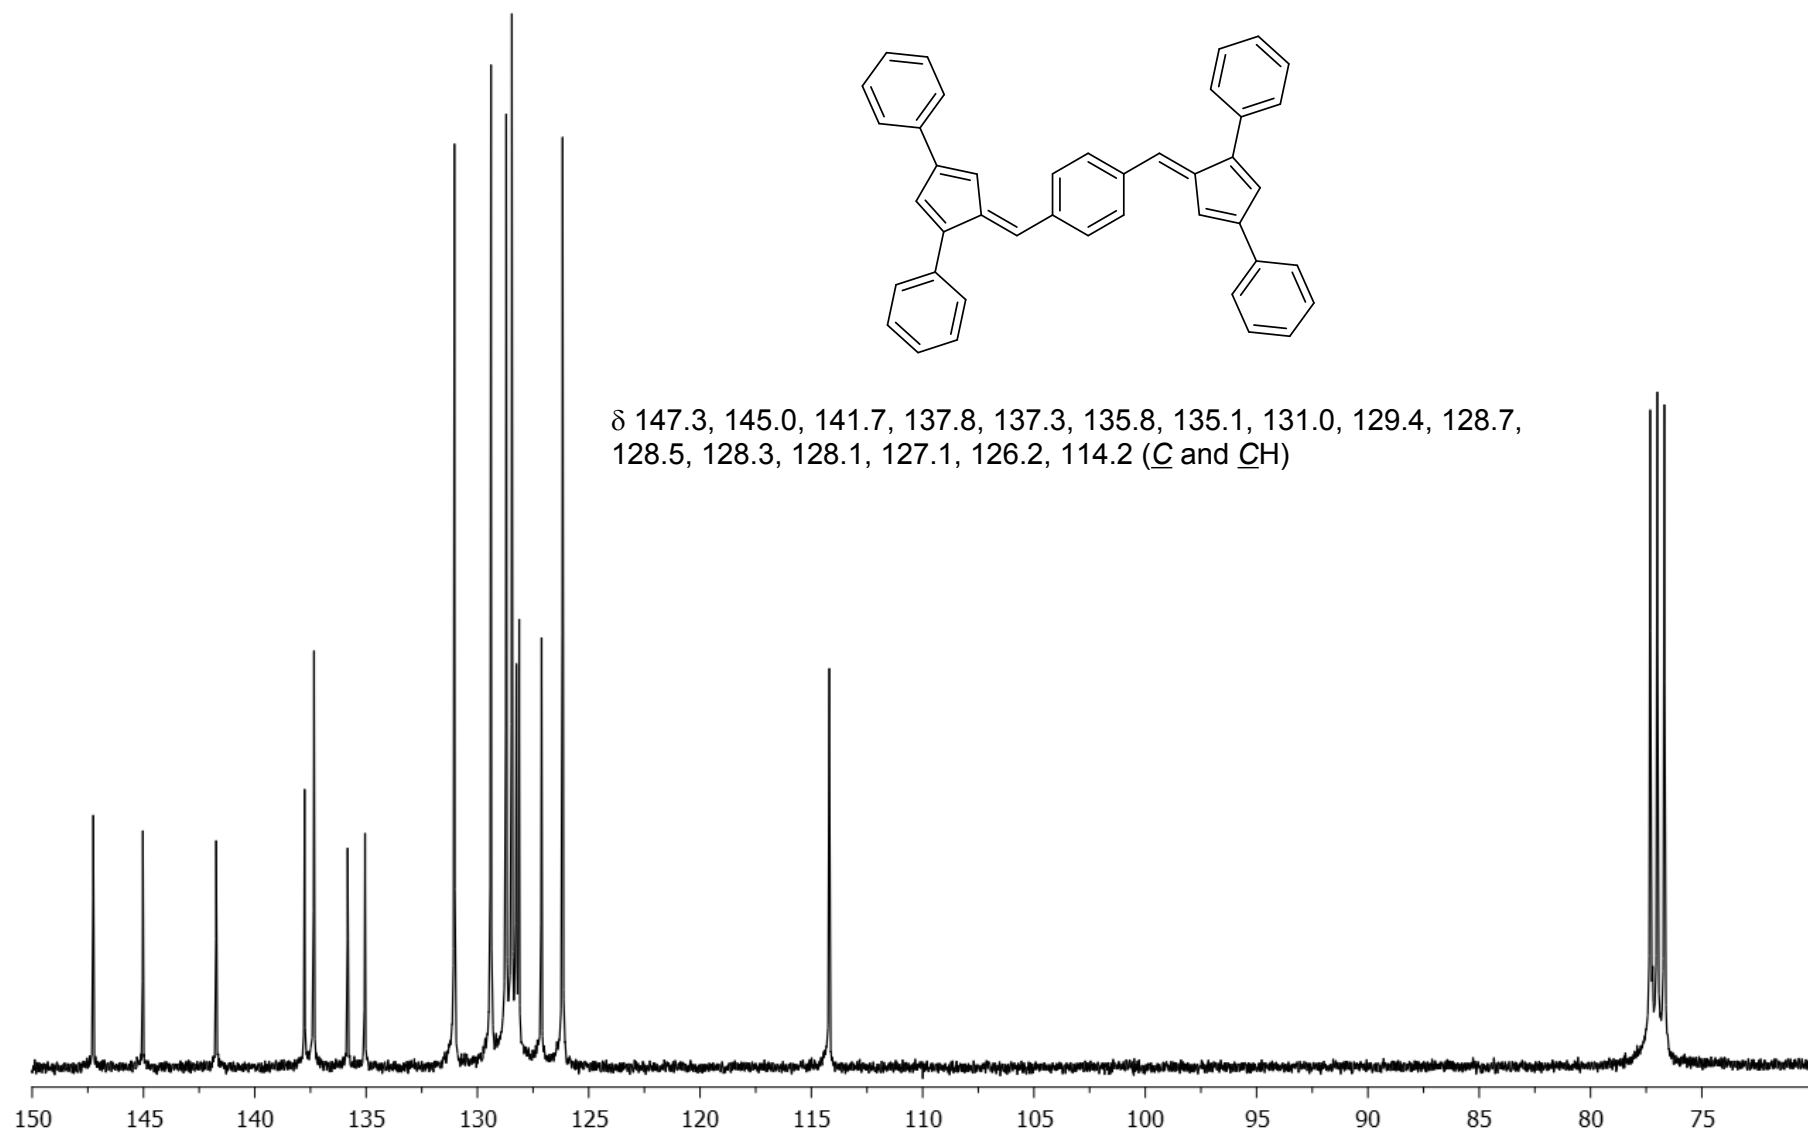

Figure S2. 100 MHz <sup>13</sup>C NMR spectrum of bis(fulvene) 1 in CDCl<sub>3</sub>.

$\delta$  7.30-7.82 (overlapping m, 28 H, PhH and exocyclic fulvene-CH); 7.09, 7.03 (broad m, 4 H, fulvene-CH); 2.06 (m, 4 H, octyl-CCH<sub>2</sub>); 1.18, 1.10 (overlapping m, 20 H, octyl-CH<sub>2</sub>); 0.78, 0.74 (t, overlapping with m, 10 H, octyl-Me and octyl-CH<sub>2</sub>)

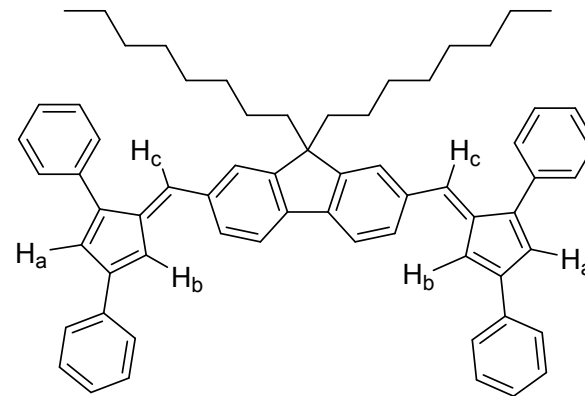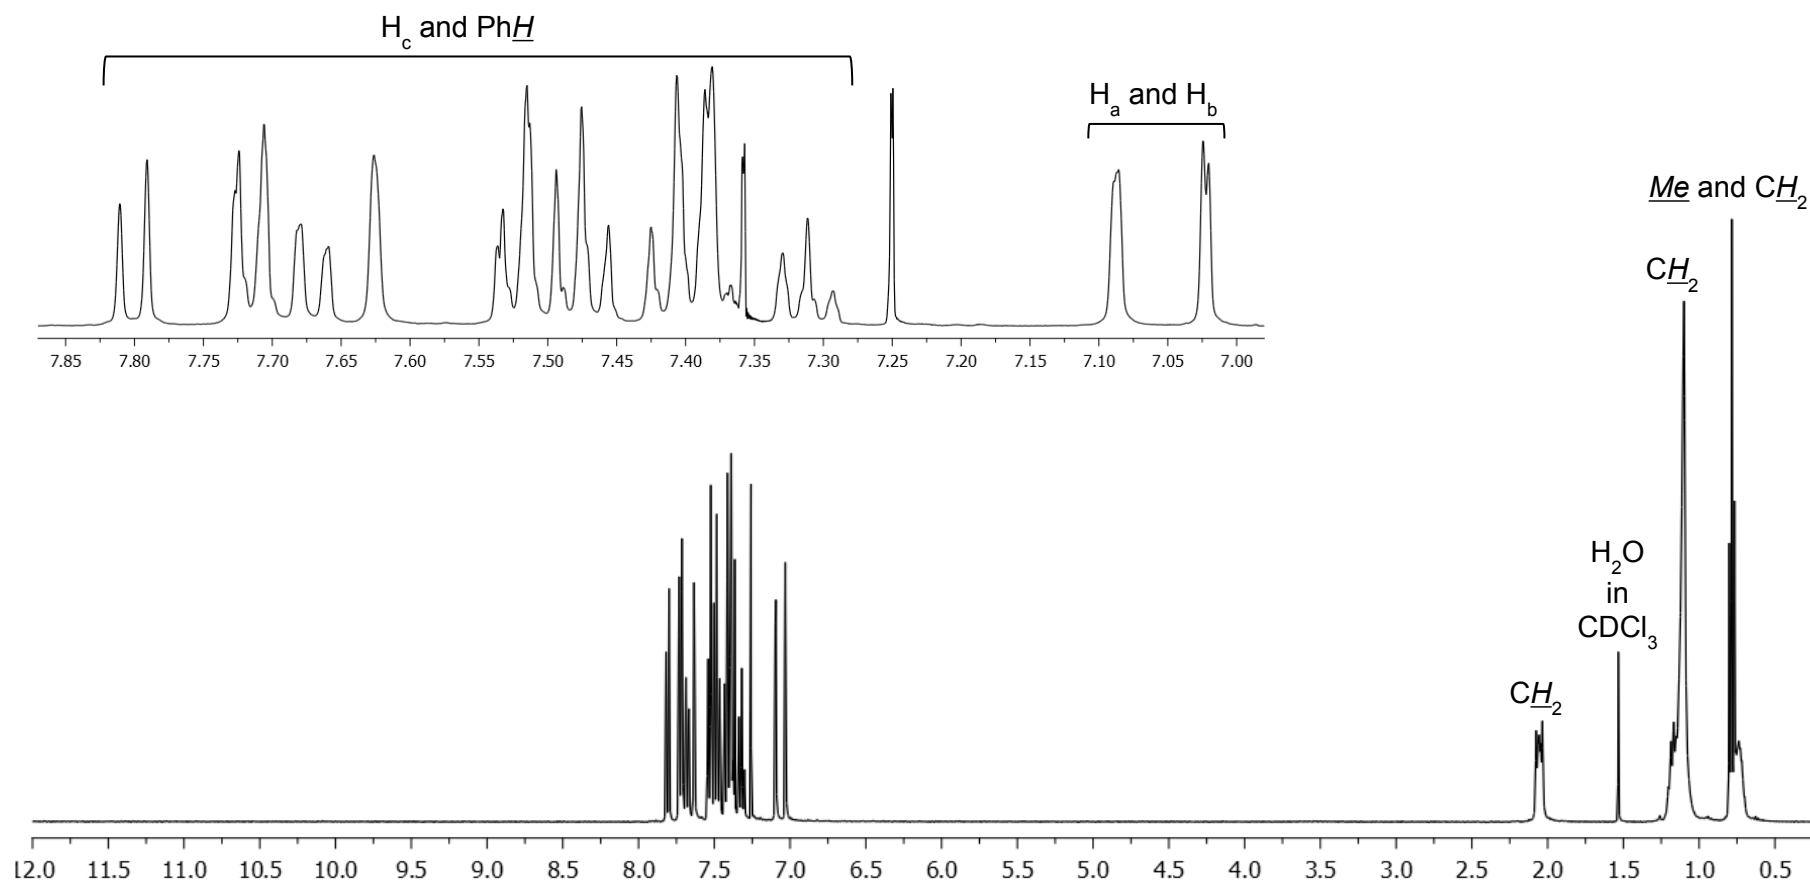

**Figure S3. 400 MHz <sup>1</sup>H NMR spectrum of bis(fulvene) 2 in CDCl<sub>3</sub>.**

$\delta$  151.9, 146.7, 144.0, 141.7, 141.6, 139.2, 136.6, 136.1, 135.3, 130.0, 129.5, 128.7, 128.4, 128.3, 127.9, 127.7, 127.0, 126.1, 125.4, 120.4, 114.6 (Ph, CCH<sub>2</sub>, and fulvene -C and -CH); 55.3, 40.4, 31.7, 30.2, 29.3, 24.0, 22.6, 14.0 (octyl -Me and CH<sub>2</sub>)

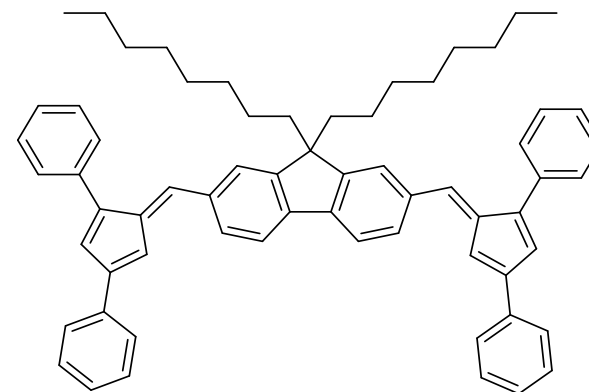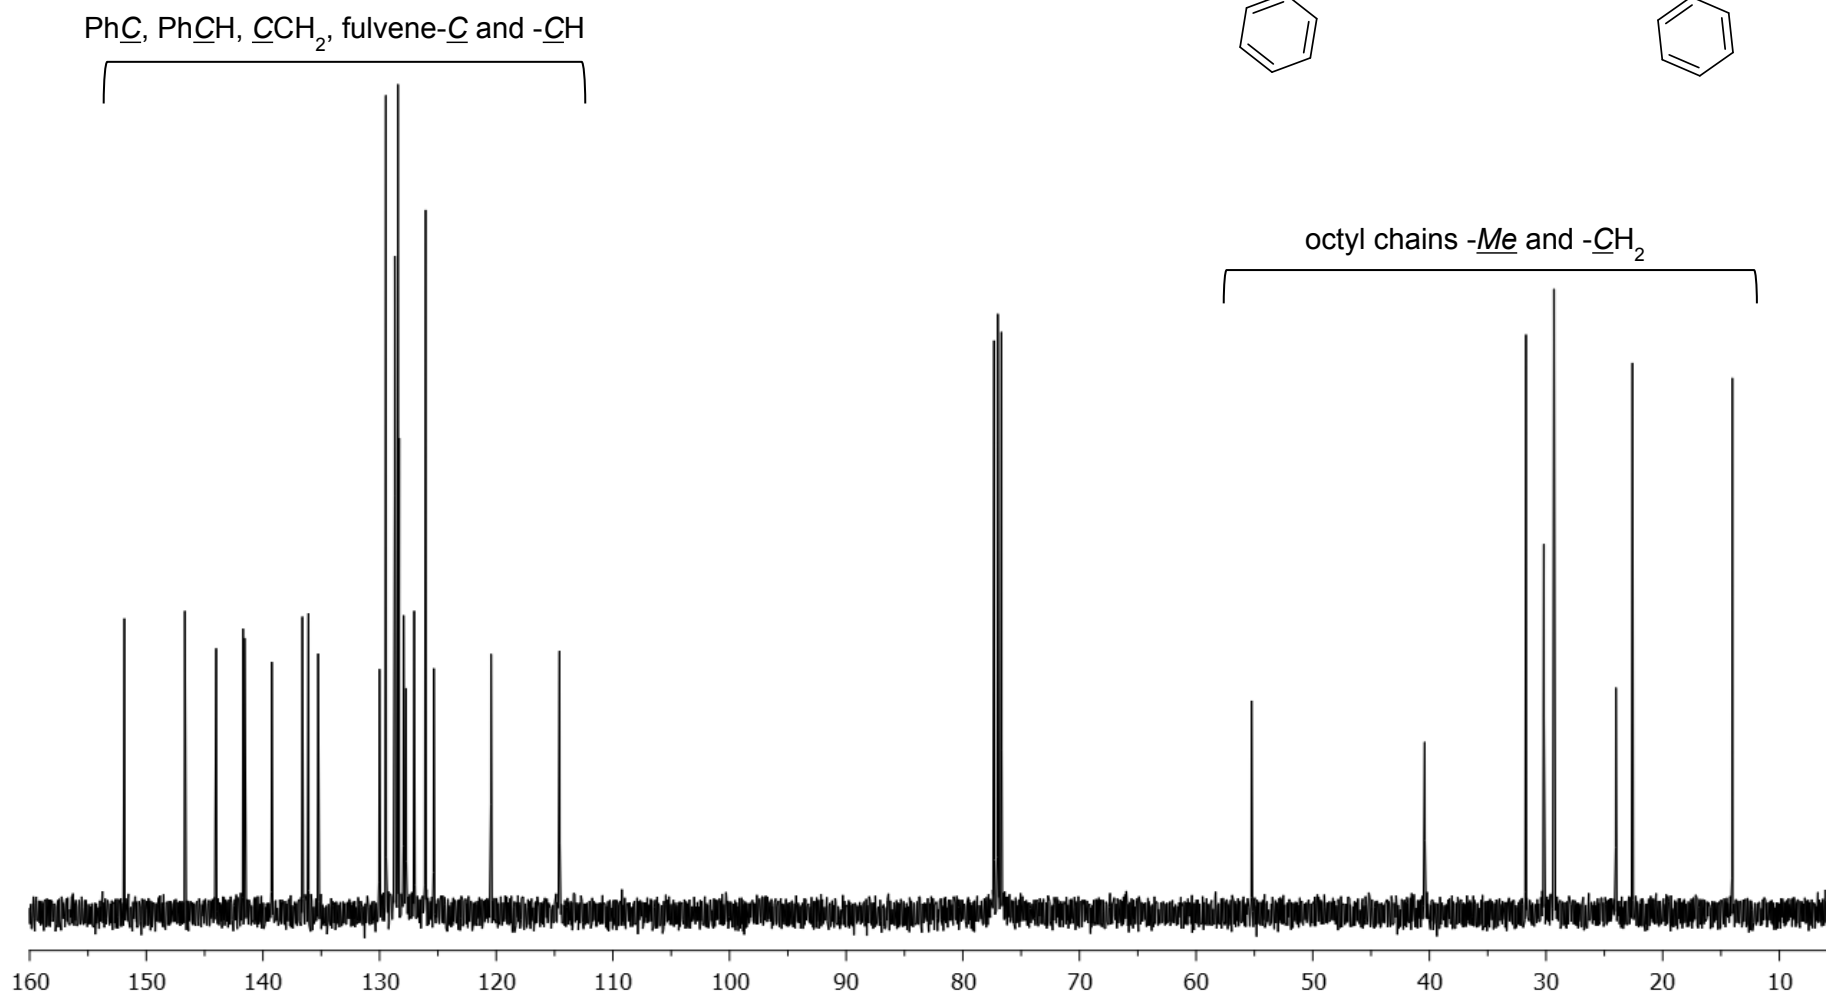

Figure S4. 100 MHz <sup>13</sup>C NMR spectrum of bis(fulvene) 2 in CDCl<sub>3</sub>.



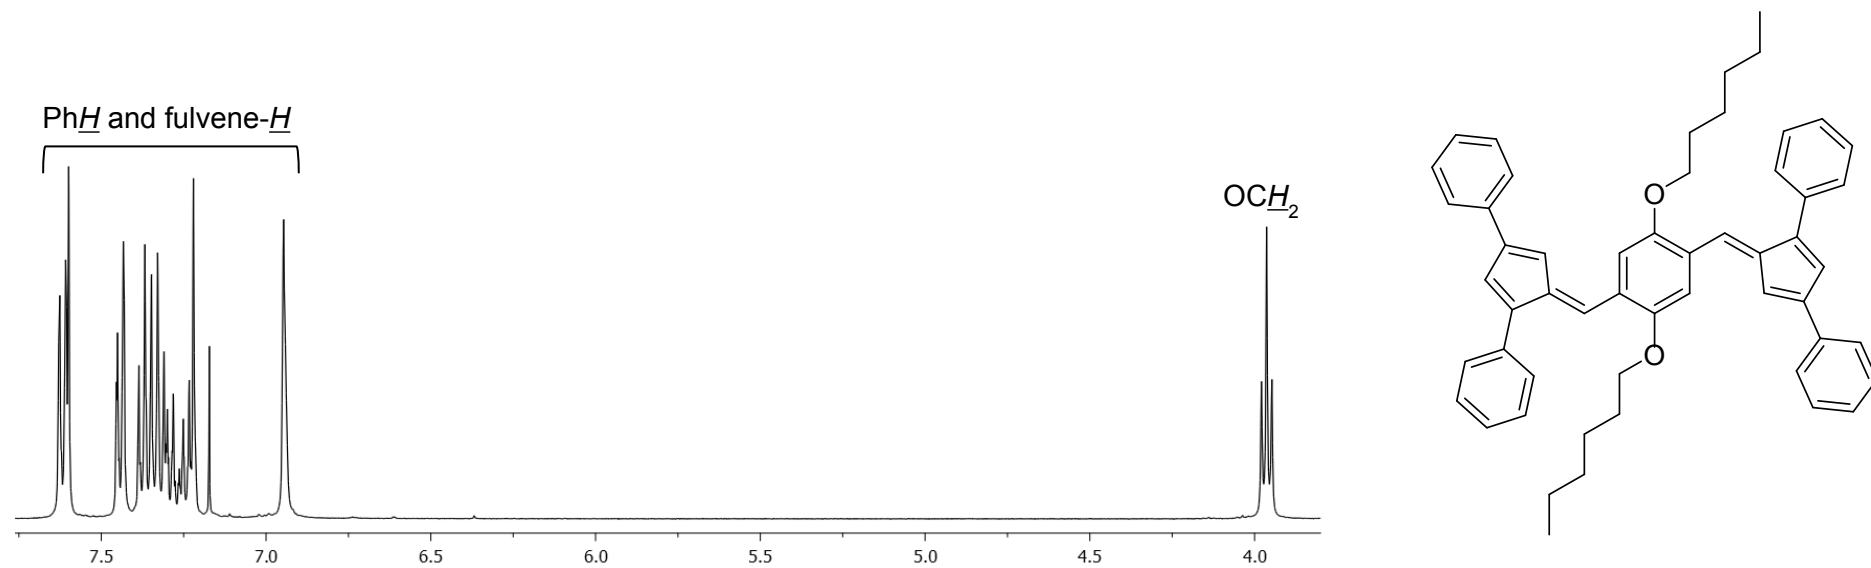

$\delta$  6.95-7.63 (overlapping m, 28 H, PhH and fulvene-CH); 3.96 (t, 4 H, OCH<sub>2</sub>,  $J = 6$  Hz); 1.71 (m, 4 H, OCH<sub>2</sub>CH<sub>2</sub>); 1.35, 1.21 (m, 12 H, CH<sub>2</sub>); 0.79 (t, 6 H, Me,  $J = 7$  Hz).

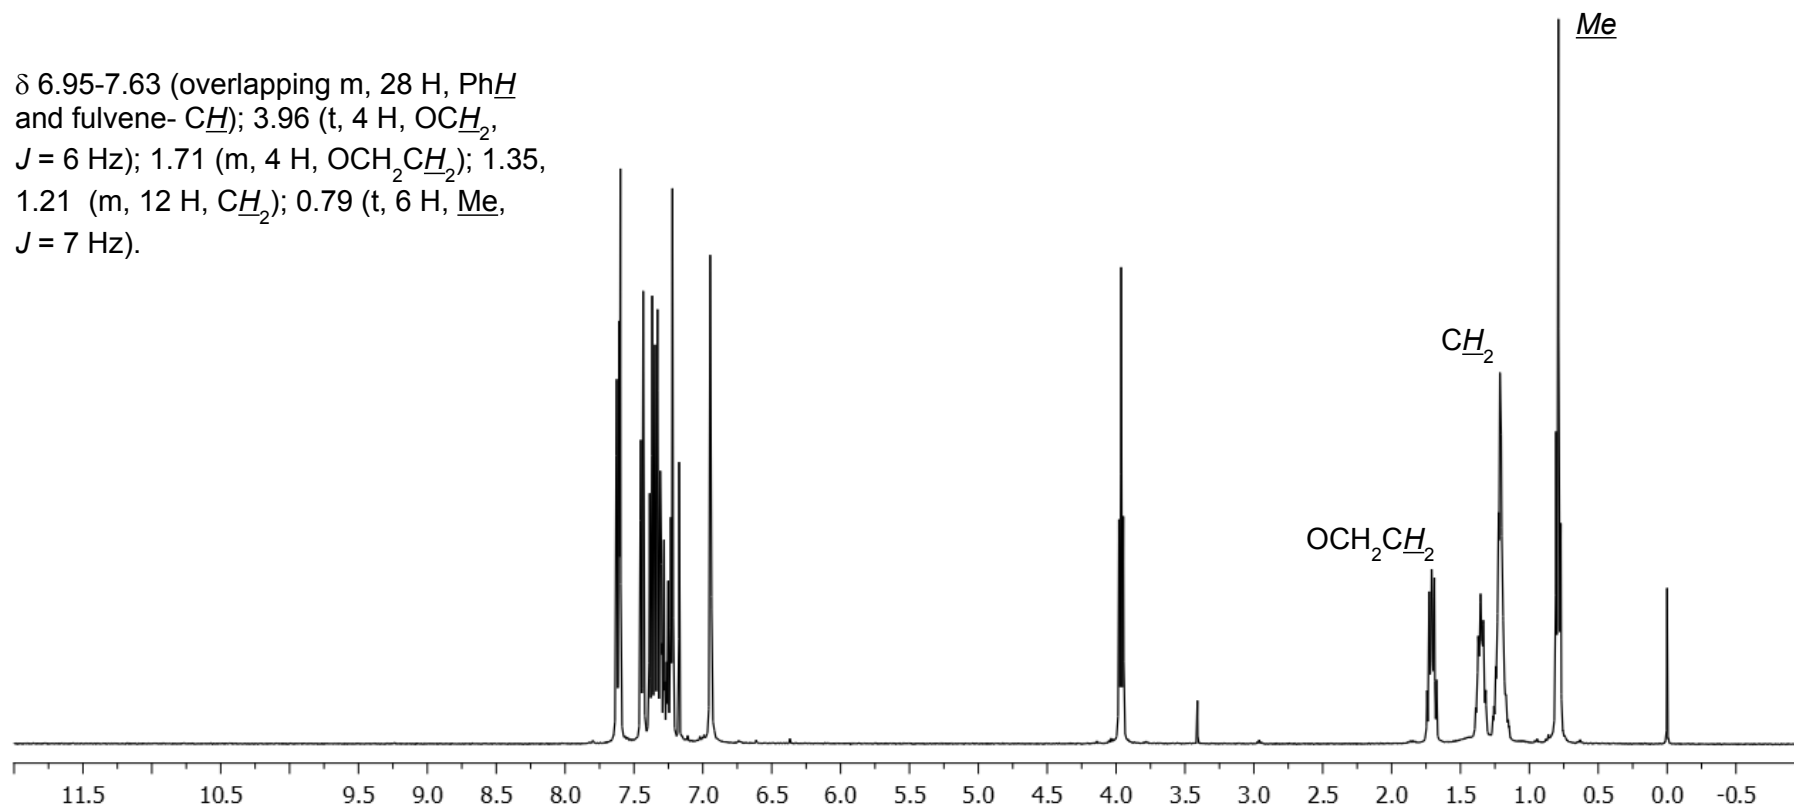

**Figure S5.** 400 MHz  $^1\text{H}$  NMR spectrum of bis(fulvene) **3** in  $\text{CDCl}_3$ .

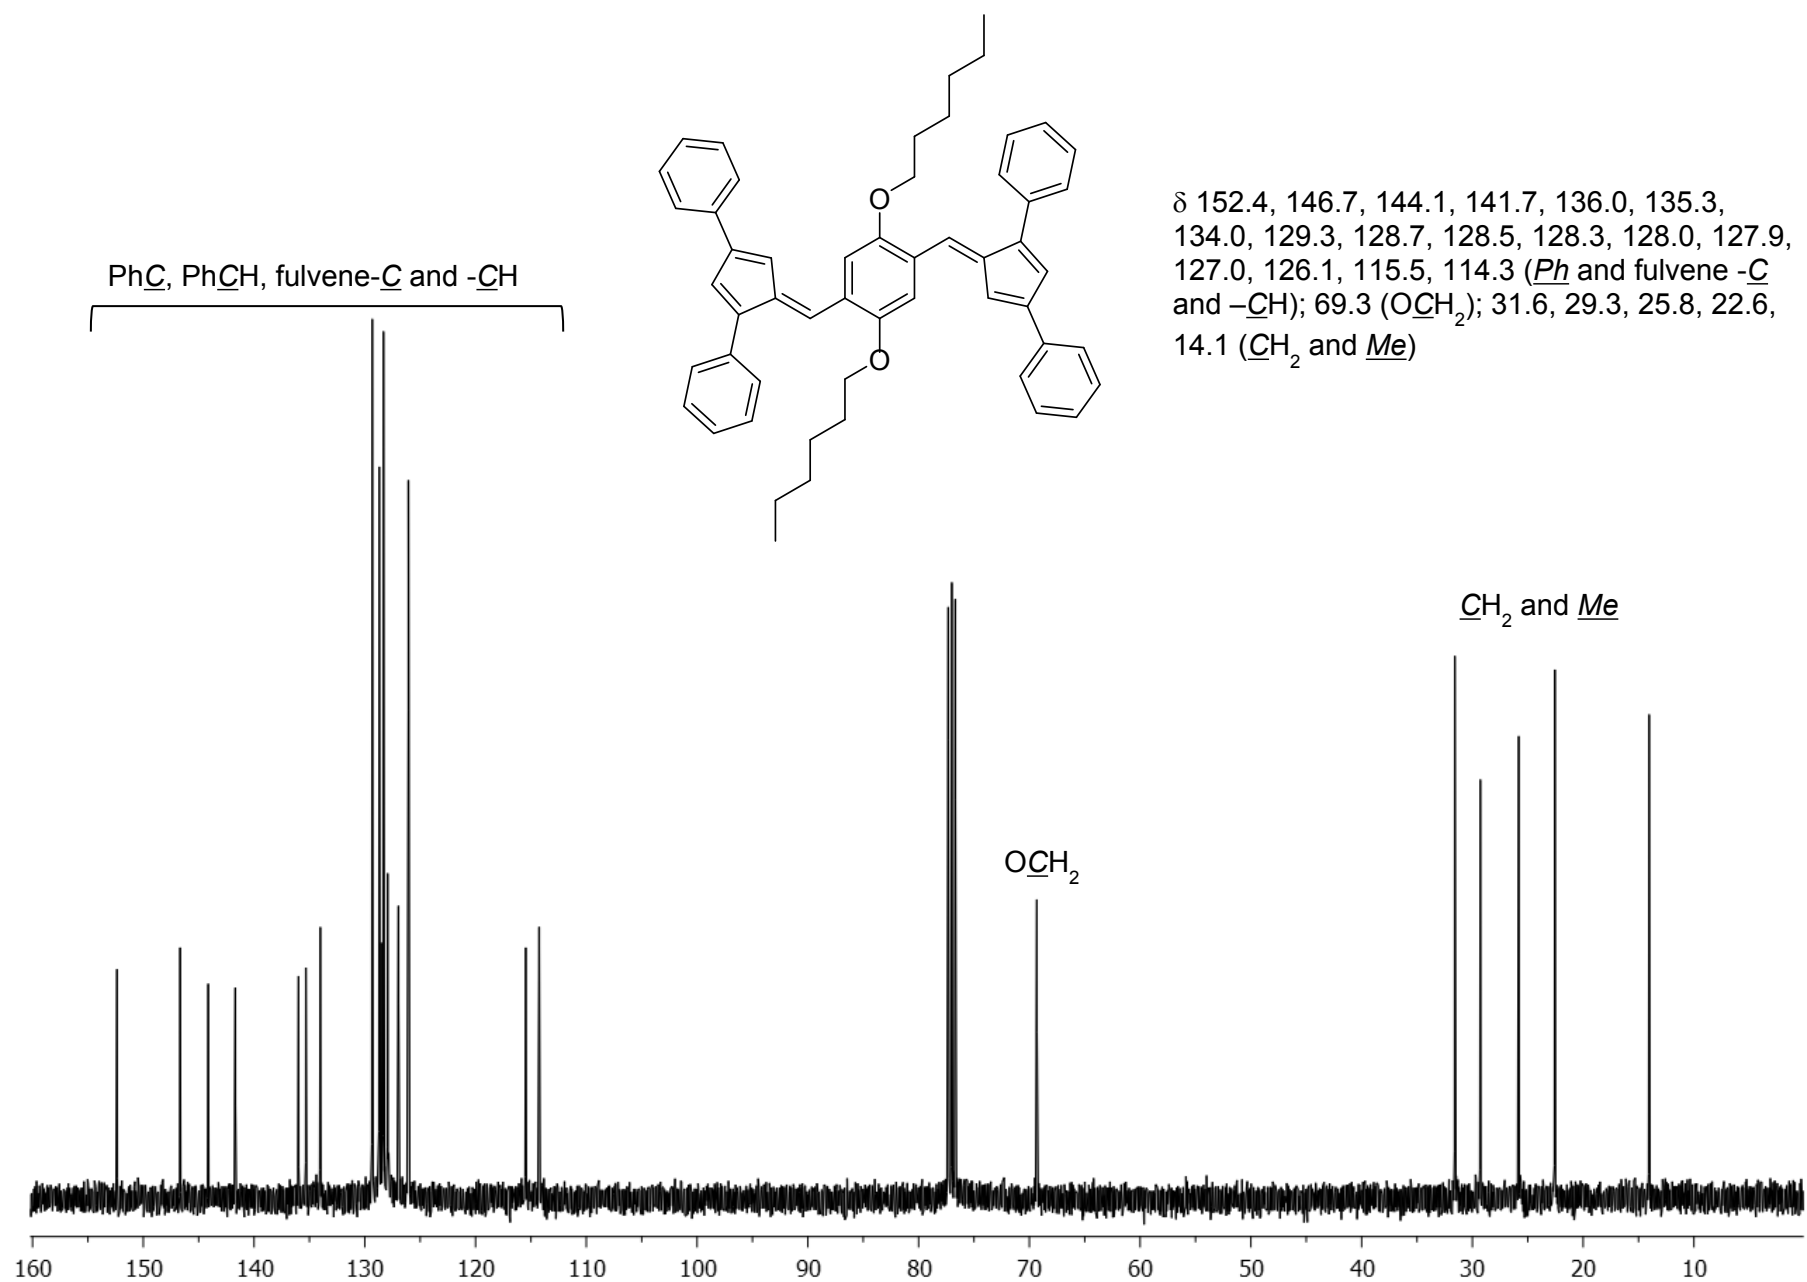

Figure S6. 100 MHz <sup>13</sup>C NMR spectrum of bis(fulvene) 3 in CDCl<sub>3</sub>.

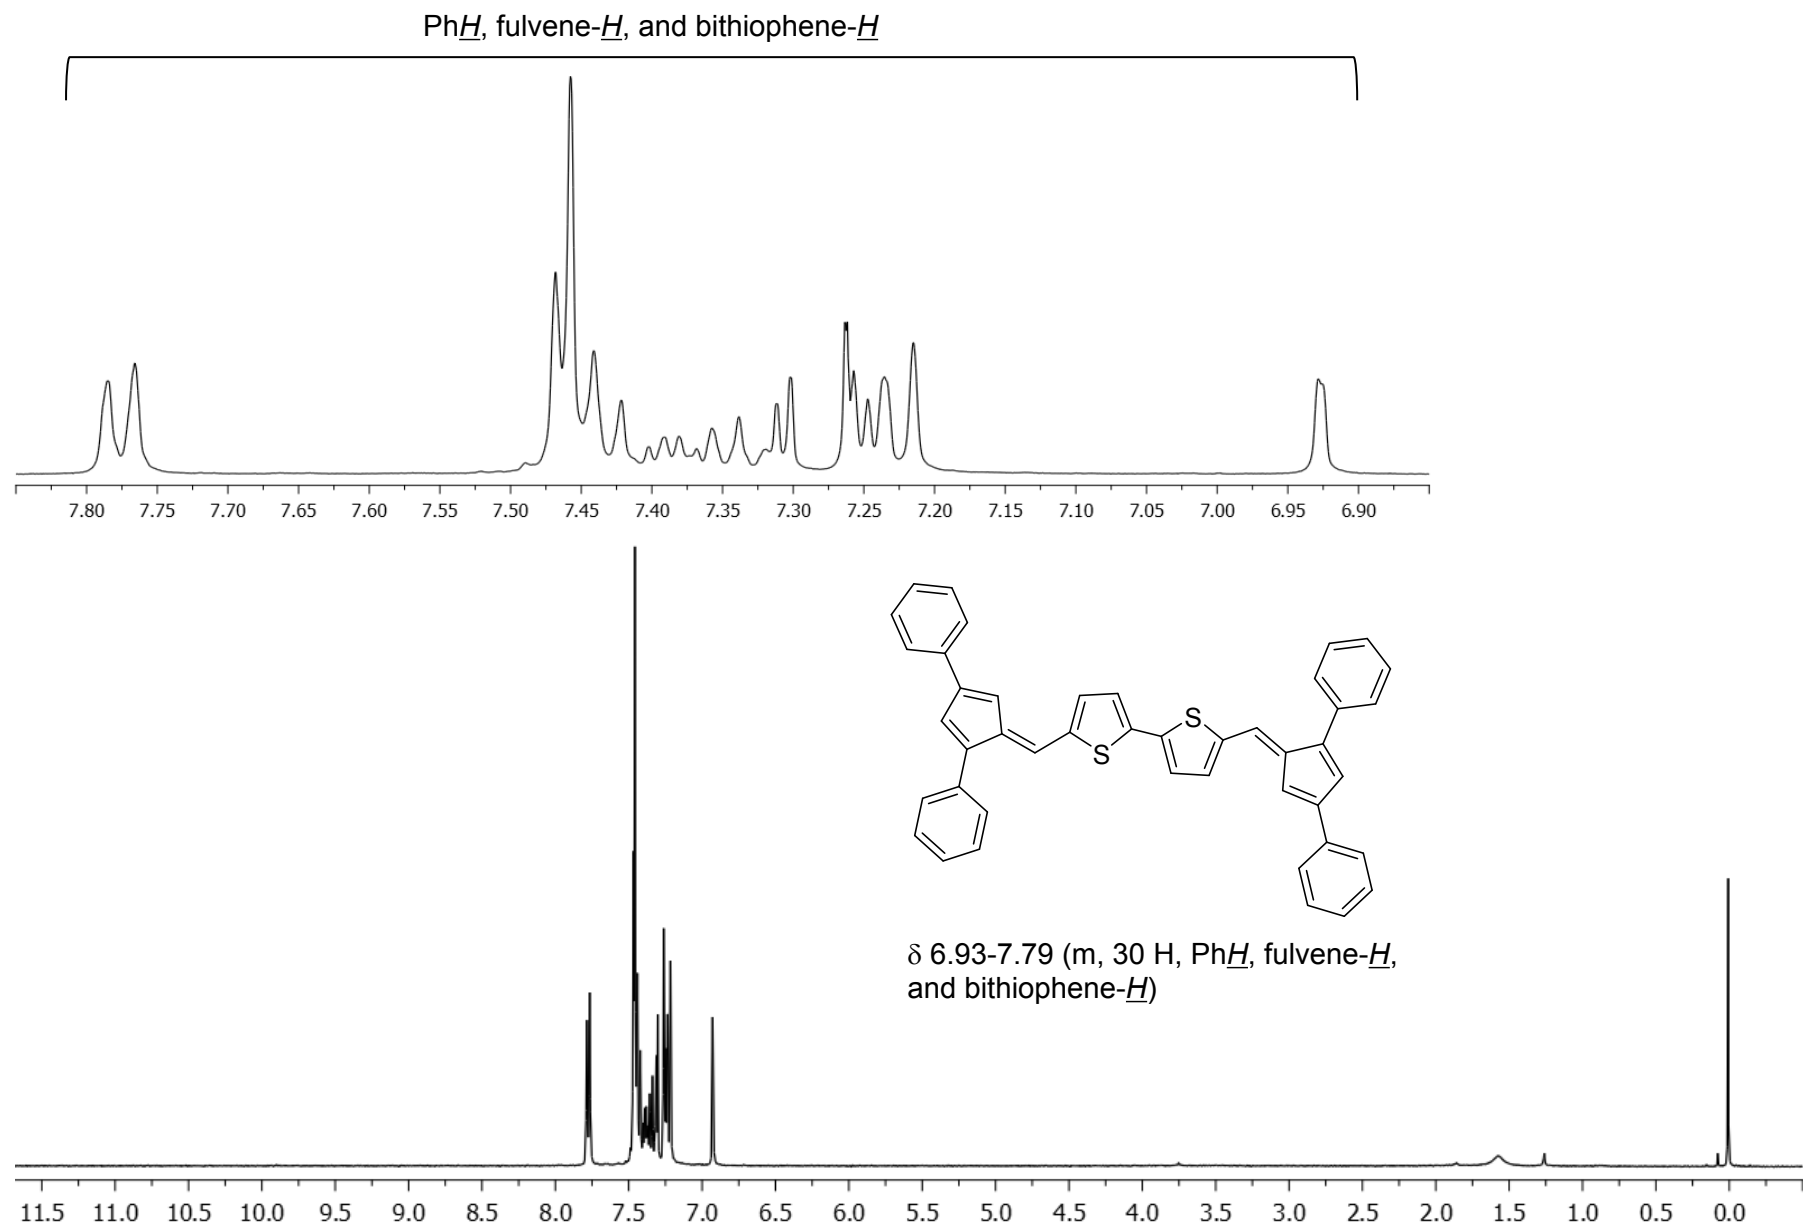

**Figure S7.** 400 MHz  $^1\text{H}$  NMR spectrum of bis(fulvene) **4** in  $\text{CDCl}_3$ .

$\delta$  146.8, 142.1, 141.9, 141.7, 141.6, 140.8, 135.9, 135.2, 135.1, 129.5, 129.3, 128.5, 128.1, 127.6, 127.1, 126.3, 125.3, 113.1

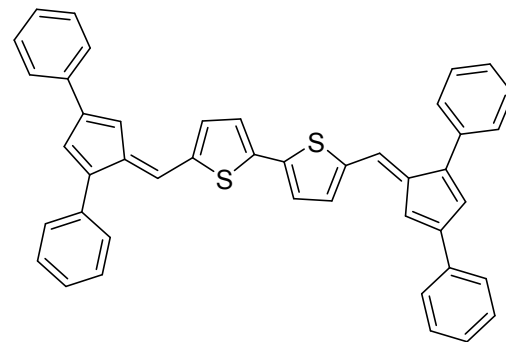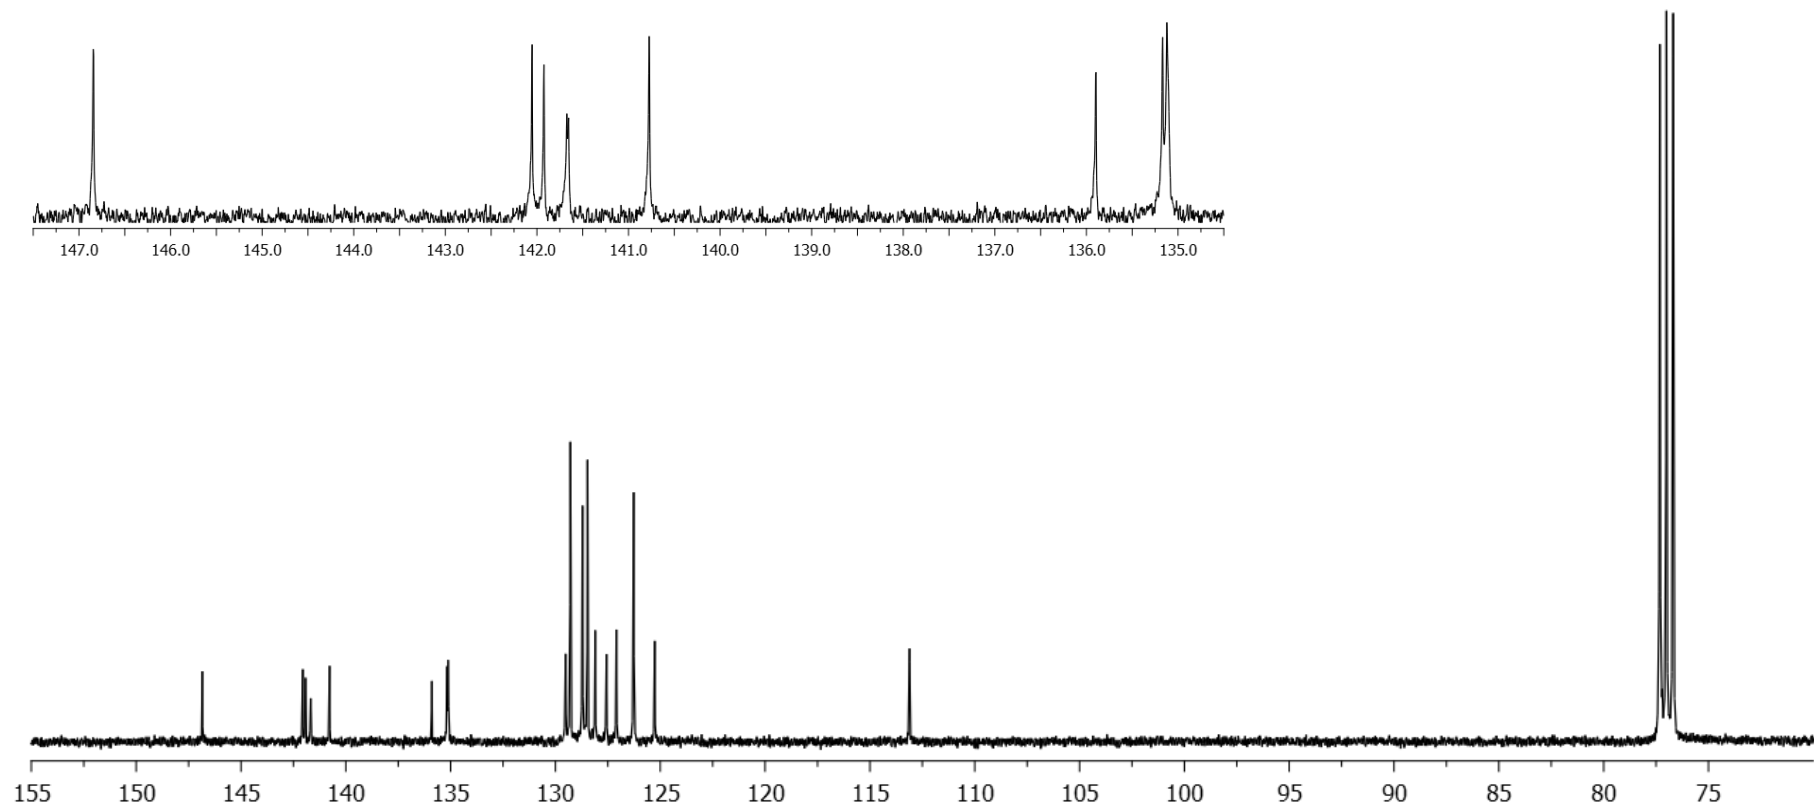

**Figure S8.** 100 MHz  $^{13}\text{C}$  NMR spectrum of bis(fulvene) 4 in  $\text{CDCl}_3$ .

## X-Ray Crystallographic Data for Bis(fulvene) 2

Crystals of bis(fulvene) **3** suitable for single crystal X-ray diffraction were obtained from 50/50 C<sub>6</sub>H<sub>6</sub>/MeOH. A red rectangular prismatic crystal of **3** measuring 0.44 × 0.13 × 0.11 mm<sup>3</sup> was mounted on a MiTeGen MicroGrabber mount using Paratone-N oil. Data was collected at 100 K using a Bruker SMART APEX CCD diffractometer. Data sets were processed using the APEX2 software suite (Bruker, version 2013.6-2).<sup>5</sup> Space group determinations were based on systematic absences and intensity statistics (XPREP, Bruker AXS Inc.),<sup>5</sup> and all data sets were corrected for absorption using SADABS (Bruker, version 2012/1).<sup>5</sup> All structures were solved using direct methods and difference map techniques, and were refined by full-matrix least squares procedures on F<sup>2</sup> (SHELXS and SHELXL, Sheldrick 2013).<sup>6</sup> All non-hydrogen atoms were refined with anisotropic displacement parameters. The H atoms were treated as idealized contributions and refined using a riding model. Thermal ellipsoid views and packing diagrams were prepared using Mercury.<sup>7</sup> Crystallographic data for **3** was deposited in the Cambridge Crystallographic Data Center (CCDC) with publication number 1007436. Copies of the crystallography data can be obtained, free of charge, from the CCDC website ([www.ccdc.cam.ac.uk](http://www.ccdc.cam.ac.uk)).

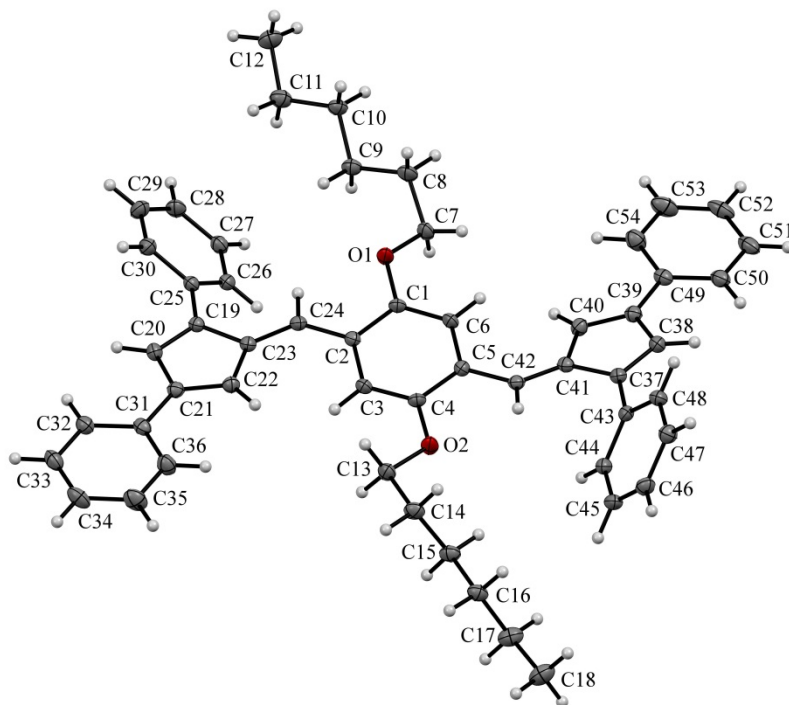

**Figure S9.** Thermal ellipsoid view of bis(fulvene) **3** (50% probability ellipsoids). Torsion angles O1C7C8C9 (57.7(2)°) and O2C13C14C15 (58.5(2)°) indicate a gauche conformation for both of the O-hexyl zigzag chains with respect to the direction of the respective O1-C7 or O2-C13 bonds. The angle between the mean plane of the zigzag chain (C13-C18) and the mean plane of the central Ph ring (C1-C6) is much larger (74.23°) compared to the same angle for the mean plane of the zigzag chain defined by C7-C12 (30.29°).

**Table S1.** Sample and crystal data for bis(fulvene) **3**.

|                                            |                                                |                           |
|--------------------------------------------|------------------------------------------------|---------------------------|
| <b>Chemical formula</b>                    | C <sub>54</sub> H <sub>54</sub> O <sub>2</sub> |                           |
| <b>Formula weight</b>                      | 734.97                                         |                           |
| <b>Temperature</b>                         | 100(2) K                                       |                           |
| <b>Wavelength</b>                          | 0.71073 Å                                      |                           |
| <b>Crystal size</b>                        | 0.110 x 0.130 x 0.440 mm                       |                           |
| <b>Crystal system</b>                      | triclinic                                      |                           |
| <b>Space group</b>                         | P-1                                            |                           |
| <b>Unit cell dimensions</b>                | a = 10.0302(19) Å                              | α = 79.160(2)°            |
|                                            | b = 14.195(3) Å                                | β = 75.233(2)°            |
|                                            | c = 15.533(3) Å                                | γ = 77.829(2)°            |
| <b>Volume</b>                              | 2069.2(7) Å <sup>3</sup>                       |                           |
| <b>Z</b>                                   | 2                                              |                           |
| <b>Density (calculated)</b>                | 1.180                                          |                           |
| <b>Absorption coefficient</b>              | 0.070 mm <sup>-1</sup>                         |                           |
| <b>F(000)</b>                              | 788                                            |                           |
| <b>Theta range for data collection</b>     | 1.87 to 28.05°                                 |                           |
| <b>Index ranges</b>                        | -13 ≤ h ≤ 13, -18 ≤ k ≤ 18, -20 ≤ l ≤ 20       |                           |
| <b>Reflections collected</b>               | 43327                                          |                           |
| <b>Independent reflections</b>             | 9982 [R(int) = 0.0569]                         |                           |
| <b>Coverage of independent reflections</b> | 99.4%                                          |                           |
| <b>Absorption correction</b>               | multi-scan                                     |                           |
| <b>Max. and min. transmission</b>          | 0.9920 and 0.9700                              |                           |
| <b>Refinement method</b>                   | Full-matrix least-squares on F <sup>2</sup>    |                           |
| <b>Data / restraints / parameters</b>      | 9982 / 0 / 505                                 |                           |
| <b>Goodness-of-fit on F<sup>2</sup></b>    | 1.022                                          |                           |
| <b>Final R indices</b>                     | 6836 data; I > 2σ(I)                           | R1 = 0.0505, wR2 = 0.1198 |
|                                            | all data                                       | R1 = 0.0825, wR2 = 0.1389 |
| <b>Largest diff. peak and hole</b>         | 0.324 and -0.262 eÅ <sup>-3</sup>              |                           |

### Selected Bond Distances (Å)

C1-O1 = 1.376(2)  
 O1-C7 = 1.434(2)  
 C1-C2 = 1.411(2)  
 C3-C4 = 1.383(2)

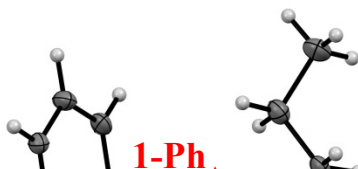

### Selected Bond Angles (°)

C19-C20-C21 = 109.76(13)  
 C22-C21-C20 = 107.88(12)  
 C21-C22-C23 = 109.51(13)  
 C22-C23-C19 = 105.52(12)

**Figure S10. Thermal ellipsoid view of bis(fulvene) 3 depicting selected bond distances and angles. Substituent angles represent the angles between the least squares planes of the Ph and fulvene rings as well as between the least squares planes defined by 6 carbon atoms of each alkyl chain. Shortest intermolecular contacts are noted between H3-H22 (1.98 Å) and H6-H7B (1.97 Å). Thermal ellipsoids are shown at the 50% probability level.**

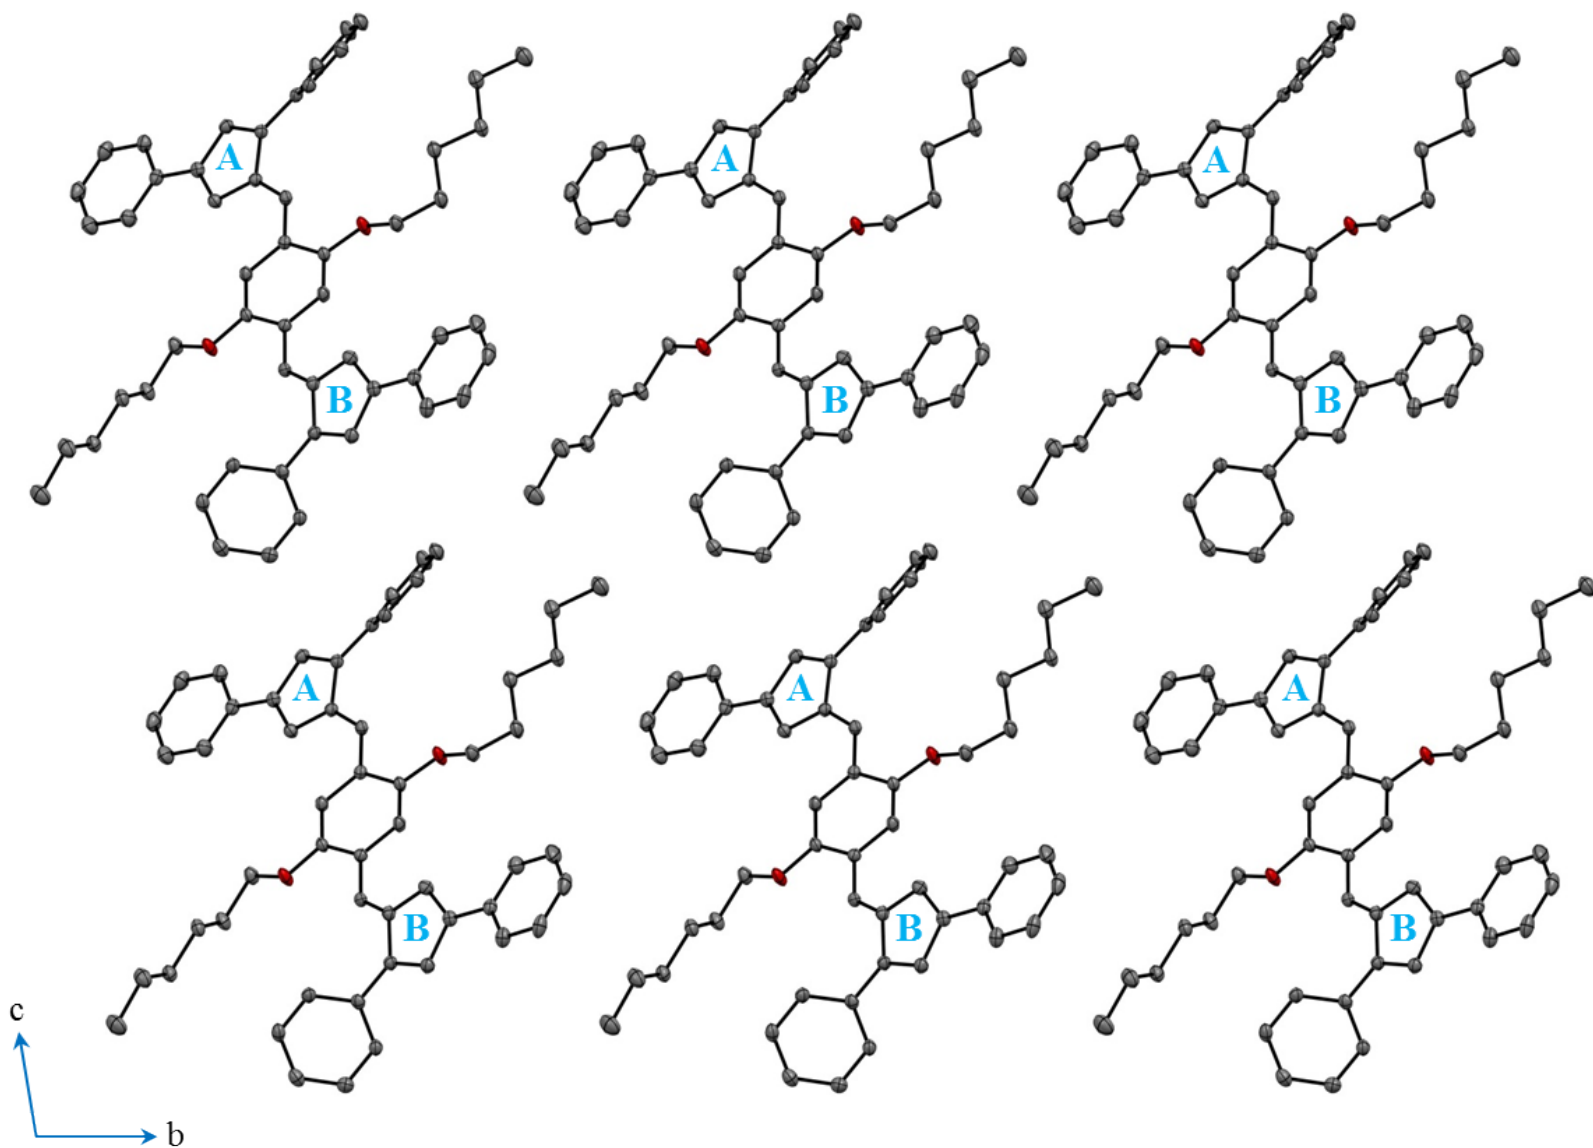

**Figure S11. Packing view of bis(fulvene) 3 , view along the a-axis direction. Molecules are aligned in the same relative orientation along the b-axis direction and align in a head-to-tail fashion with respect to the fulvene rings, A and B, along the c-axis direction. Thermal ellipsoids are shown at the 50% probability level. Hydrogen atoms were omitted for clarity.**



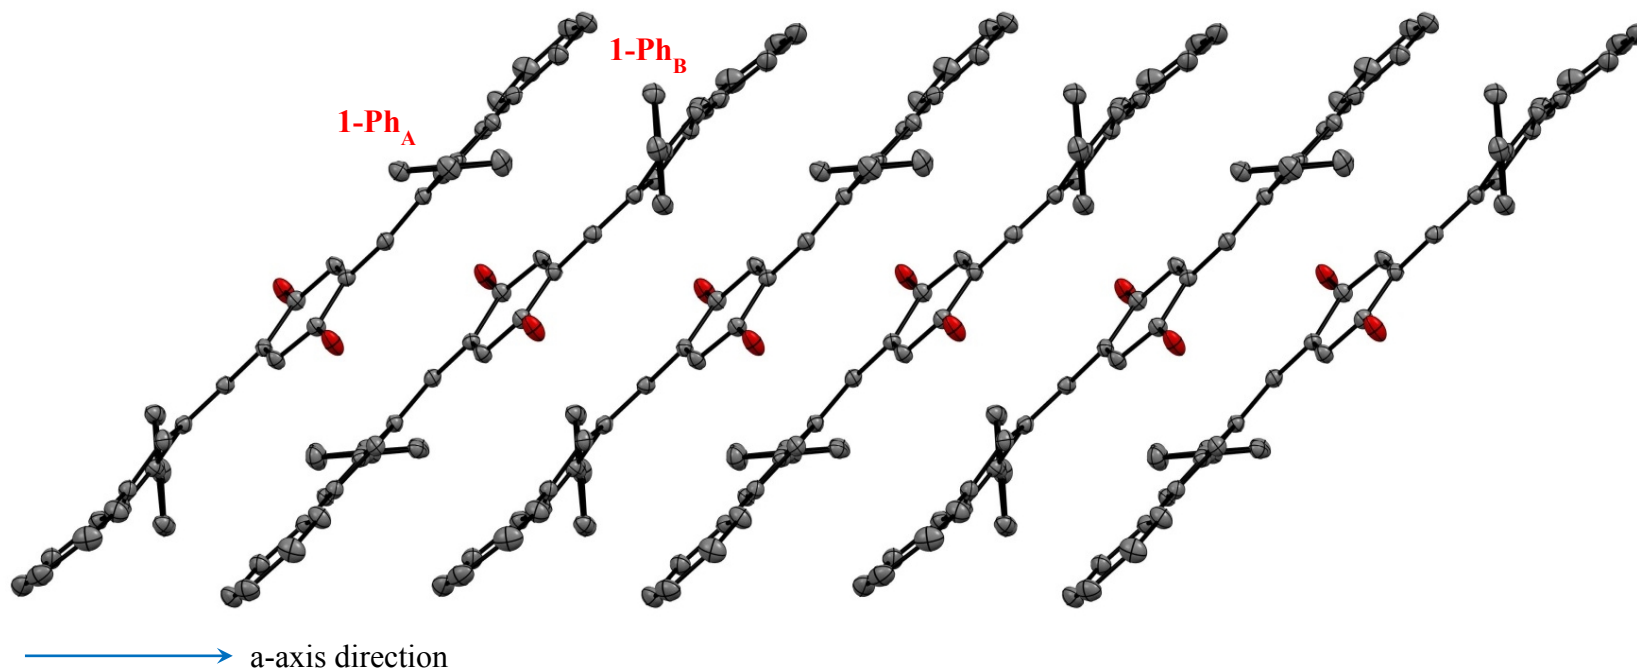

Figure S12. Packing view of bis(fulvene) **3**, view perpendicular to the a-axis direction showing large angle ( $89.4^\circ$ ) between the least squares planes of the **1-Ph<sub>A</sub>** and **1-Ph<sub>B</sub>** rings along the a-axis direction. The least squares plane of the central-Ph group is tipped  $24.3^\circ$  with respect to the 100 plane. Thermal ellipsoids are shown at the 50% probability level. The alkyl chains and hydrogen atoms were omitted for clarity.

Table S2. Atomic coordinates and equivalent isotropic atomic displacement parameters ( $\text{\AA}^2$ ) for bis(fulvene) **3**.

U(eq) is defined as one third of the trace of the orthogonalized  $U_{ij}$  tensor.

|     | <b>x/a</b>  | <b>y/b</b>  | <b>z/c</b>  | <b>U(eq)</b> |
|-----|-------------|-------------|-------------|--------------|
| O1  | 0.71901(12) | 0.67710(7)  | 0.39624(7)  | 0.0253(3)    |
| O2  | 0.74540(12) | 0.32987(7)  | 0.62493(7)  | 0.0254(3)    |
| C1  | 0.73810(15) | 0.58840(10) | 0.44952(10) | 0.0179(3)    |
| C2  | 0.68870(14) | 0.51206(10) | 0.42740(9)  | 0.0161(3)    |
| C3  | 0.69228(15) | 0.42454(10) | 0.48720(10) | 0.0182(3)    |
| C4  | 0.74226(15) | 0.41324(10) | 0.56433(10) | 0.0177(3)    |
| C5  | 0.79735(14) | 0.48825(10) | 0.58402(9)  | 0.0160(3)    |
| C6  | 0.79251(15) | 0.57557(10) | 0.52486(10) | 0.0187(3)    |
| C7  | 0.81024(16) | 0.74417(11) | 0.39157(10) | 0.0222(3)    |
| C8  | 0.74952(18) | 0.84136(11) | 0.34578(11) | 0.0257(4)    |
| C9  | 0.72845(16) | 0.84220(11) | 0.25234(10) | 0.0228(3)    |
| C10 | 0.67034(16) | 0.94381(11) | 0.21086(10) | 0.0230(3)    |
| C11 | 0.63921(18) | 0.94748(11) | 0.11973(11) | 0.0273(4)    |
| C12 | 0.59507(19) | 0.05109(12) | 0.07648(12) | 0.0342(4)    |
| C13 | 0.66028(16) | 0.26109(11) | 0.62271(10) | 0.0226(3)    |
| C14 | 0.65688(16) | 0.19068(11) | 0.70861(11) | 0.0236(3)    |

**Table S2. Atomic coordinates and equivalent isotropic atomic displacement parameters ( $\text{\AA}^2$ ) for bis(fulvene) 3.**

U(eq) is defined as one third of the trace of the orthogonalized  $U_{ij}$  tensor.

|     |             |             |             |           |
|-----|-------------|-------------|-------------|-----------|
| C15 | 0.80108(16) | 0.13771(11) | 0.72082(10) | 0.0228(3) |
| C16 | 0.79760(16) | 0.06687(11) | 0.80738(10) | 0.0230(3) |
| C17 | 0.94174(17) | 0.01133(12) | 0.81566(11) | 0.0304(4) |
| C18 | 0.94326(19) | 0.94424(13) | 0.90433(12) | 0.0364(4) |
| C19 | 0.54977(15) | 0.49649(10) | 0.21818(9)  | 0.0168(3) |
| C20 | 0.48054(15) | 0.42792(10) | 0.20857(10) | 0.0182(3) |
| C21 | 0.46396(14) | 0.35659(10) | 0.29024(10) | 0.0178(3) |
| C22 | 0.52387(15) | 0.38302(10) | 0.34912(10) | 0.0184(3) |
| C23 | 0.58109(14) | 0.47119(10) | 0.30904(9)  | 0.0164(3) |
| C24 | 0.64395(14) | 0.52717(10) | 0.34327(10) | 0.0172(3) |
| C25 | 0.58875(15) | 0.57872(10) | 0.14898(10) | 0.0179(3) |
| C26 | 0.71955(15) | 0.60732(10) | 0.13113(10) | 0.0191(3) |
| C27 | 0.75474(16) | 0.68252(11) | 0.06303(10) | 0.0222(3) |
| C28 | 0.66046(17) | 0.73020(11) | 0.01099(11) | 0.0257(4) |
| C29 | 0.53083(17) | 0.70234(11) | 0.02732(11) | 0.0275(4) |
| C30 | 0.49522(16) | 0.62777(11) | 0.09571(10) | 0.0228(3) |
| C31 | 0.39527(15) | 0.27147(11) | 0.30450(10) | 0.0193(3) |

**Table S2. Atomic coordinates and equivalent isotropic atomic displacement parameters ( $\text{\AA}^2$ ) for bis(fulvene) 3.**

U(eq) is defined as one third of the trace of the orthogonalized  $U_{ij}$  tensor.

|     |             |             |             |           |
|-----|-------------|-------------|-------------|-----------|
| C32 | 0.32754(16) | 0.25605(11) | 0.24115(11) | 0.0227(3) |
| C33 | 0.26306(17) | 0.17540(12) | 0.25521(11) | 0.0275(4) |
| C34 | 0.26460(18) | 0.10834(12) | 0.33176(11) | 0.0299(4) |
| C35 | 0.33109(19) | 0.12228(12) | 0.39526(12) | 0.0317(4) |
| C36 | 0.39495(17) | 0.20292(12) | 0.38180(11) | 0.0262(4) |
| C37 | 0.93778(15) | 0.51734(10) | 0.78712(10) | 0.0174(3) |
| C38 | 0.99979(15) | 0.59181(10) | 0.79214(10) | 0.0194(3) |
| C39 | 0.03031(15) | 0.65068(11) | 0.70343(10) | 0.0186(3) |
| C40 | 0.98447(15) | 0.61148(11) | 0.64517(10) | 0.0195(3) |
| C41 | 0.91920(15) | 0.52856(10) | 0.69365(10) | 0.0176(3) |
| C42 | 0.84200(14) | 0.47557(10) | 0.66782(9)  | 0.0169(3) |
| C43 | 0.89516(15) | 0.44051(10) | 0.86064(10) | 0.0174(3) |
| C44 | 0.92350(15) | 0.34251(11) | 0.84822(10) | 0.0198(3) |
| C45 | 0.88771(16) | 0.27032(11) | 0.91894(11) | 0.0234(3) |
| C46 | 0.82209(16) | 0.29390(11) | 0.00386(11) | 0.0235(3) |
| C47 | 0.79331(16) | 0.39070(11) | 0.01757(10) | 0.0234(3) |
| C48 | 0.82897(15) | 0.46317(11) | 0.94679(10) | 0.0206(3) |

**Table S2. Atomic coordinates and equivalent isotropic atomic displacement parameters ( $\text{\AA}^2$ ) for bis(fulvene) 3.**

U(eq) is defined as one third of the trace of the orthogonalized  $U_{ij}$  tensor.

|     |             |             |             |           |
|-----|-------------|-------------|-------------|-----------|
| C49 | 0.10081(15) | 0.73546(11) | 0.68196(10) | 0.0203(3) |
| C50 | 0.17763(16) | 0.75261(11) | 0.73923(11) | 0.0249(3) |
| C51 | 0.24931(17) | 0.83047(12) | 0.71773(12) | 0.0297(4) |
| C52 | 0.24489(18) | 0.89348(12) | 0.63866(12) | 0.0316(4) |
| C53 | 0.16703(19) | 0.87890(12) | 0.58181(12) | 0.0337(4) |
| C54 | 0.09596(17) | 0.80066(12) | 0.60321(11) | 0.0281(4) |

**Table S3. Bond lengths (Å) for bis(fulvene) 3.**

|          |            |          |            |
|----------|------------|----------|------------|
| O1-C1    | 1.3762(17) | O1-C7    | 1.4341(17) |
| O2-C4    | 1.3667(17) | O2-C13   | 1.4362(17) |
| C1-C6    | 1.380(2)   | C1-C2    | 1.4111(19) |
| C2-C3    | 1.4041(19) | C2-C24   | 1.452(2)   |
| C3-C4    | 1.383(2)   | C3-H3    | 0.95       |
| C4-C5    | 1.410(2)   | C5-C6    | 1.397(2)   |
| C5-C42   | 1.4501(19) | C6-H6    | 0.95       |
| C7-C8    | 1.509(2)   | C7-H7A   | 0.99       |
| C7-H7B   | 0.99       | C8-C9    | 1.517(2)   |
| C8-H8A   | 0.99       | C8-H8B   | 0.99       |
| C9-C10   | 1.524(2)   | C9-H9A   | 0.99       |
| C9-H9B   | 0.99       | C10-C11  | 1.515(2)   |
| C10-H10A | 0.99       | C10-H10B | 0.99       |

**Table S3. Bond lengths (Å) for bis(fulvene) 3.**

|          |          |          |            |
|----------|----------|----------|------------|
| C11-C12  | 1.522(2) | C11-H11A | 0.99       |
| C11-H11B | 0.99     | C12-H12A | 0.98       |
| C12-H12B | 0.98     | C12-H12C | 0.98       |
| C13-C14  | 1.507(2) | C13-H13A | 0.99       |
| C13-H13B | 0.99     | C14-C15  | 1.523(2)   |
| C14-H14A | 0.99     | C14-H14B | 0.99       |
| C15-C16  | 1.517(2) | C15-H15A | 0.99       |
| C15-H15B | 0.99     | C16-C17  | 1.518(2)   |
| C16-H16A | 0.99     | C16-H16B | 0.99       |
| C17-C18  | 1.522(2) | C17-H17A | 0.99       |
| C17-H17B | 0.99     | C18-H18A | 0.98       |
| C18-H18B | 0.98     | C18-H18C | 0.98       |
| C19-C20  | 1.358(2) | C19-C25  | 1.475(2)   |
| C19-C23  | 1.486(2) | C20-C21  | 1.464(2)   |
| C20-H20  | 0.95     | C21-C22  | 1.357(2)   |
| C21-C31  | 1.468(2) | C22-C23  | 1.4528(19) |
| C22-H22  | 0.95     | C23-C24  | 1.3613(19) |
| C24-H24  | 0.95     | C25-C30  | 1.397(2)   |
| C25-C26  | 1.400(2) | C26-C27  | 1.388(2)   |
| C26-H26  | 0.95     | C27-C28  | 1.386(2)   |

**Table S3. Bond lengths (Å) for bis(fulvene) 3.**

|         |          |         |          |
|---------|----------|---------|----------|
| C27-H27 | 0.95     | C28-C29 | 1.386(2) |
| C28-H28 | 0.95     | C29-C30 | 1.386(2) |
| C29-H29 | 0.95     | C30-H30 | 0.95     |
| C31-C36 | 1.396(2) | C31-C32 | 1.401(2) |
| C32-C33 | 1.387(2) | C32-H32 | 0.95     |
| C33-C34 | 1.378(2) | C33-H33 | 0.95     |
| C34-C35 | 1.386(2) | C34-H34 | 0.95     |
| C35-C36 | 1.384(2) | C35-H35 | 0.95     |
| C36-H36 | 0.95     | C37-C38 | 1.358(2) |
| C37-C43 | 1.468(2) | C37-C41 | 1.486(2) |
| C38-C39 | 1.466(2) | C38-H38 | 0.95     |
| C39-C40 | 1.360(2) | C39-C49 | 1.465(2) |
| C40-C41 | 1.456(2) | C40-H40 | 0.95     |
| C41-C42 | 1.358(2) | C42-H42 | 0.95     |
| C43-C48 | 1.398(2) | C43-C44 | 1.400(2) |
| C44-C45 | 1.384(2) | C44-H44 | 0.95     |
| C45-C46 | 1.384(2) | C45-H45 | 0.95     |
| C46-C47 | 1.388(2) | C46-H46 | 0.95     |
| C47-C48 | 1.387(2) | C47-H47 | 0.95     |
| C48-H48 | 0.95     | C49-C54 | 1.393(2) |

**Table S3. Bond lengths (Å) for bis(fulvene) 3.**

|         |          |         |          |
|---------|----------|---------|----------|
| C49-C50 | 1.398(2) | C50-C51 | 1.387(2) |
| C50-H50 | 0.95     | C51-C52 | 1.381(2) |
| C51-H51 | 0.95     | C52-C53 | 1.386(3) |
| C52-H52 | 0.95     | C53-C54 | 1.388(2) |
| C53-H53 | 0.95     | C54-H54 | 0.95     |

**Table S4. Bond angles (°) for bis(fulvene) 3.**

|           |            |           |            |
|-----------|------------|-----------|------------|
| C1-O1-C7  | 118.22(11) | C4-O2-C13 | 118.35(11) |
| O1-C1-C6  | 122.38(13) | O1-C1-C2  | 116.42(12) |
| C6-C1-C2  | 121.01(13) | C3-C2-C1  | 117.05(13) |
| C3-C2-C24 | 124.44(13) | C1-C2-C24 | 118.45(13) |
| C4-C3-C2  | 121.67(13) | C4-C3-H3  | 119.2      |
| C2-C3-H3  | 119.2      | O2-C4-C3  | 123.47(13) |
| O2-C4-C5  | 115.50(12) | C3-C4-C5  | 121.01(13) |
| C6-C5-C4  | 117.16(13) | C6-C5-C42 | 123.18(13) |
| C4-C5-C42 | 119.34(13) | C1-C6-C5  | 121.99(13) |
| C1-C6-H6  | 119.0      | C5-C6-H6  | 119.0      |
| O1-C7-C8  | 107.50(12) | O1-C7-H7A | 110.2      |



**Table S4. Bond angles (°) for bis(fulvene) 3.**

|               |            |               |       |
|---------------|------------|---------------|-------|
| C8-C7-H7A     | 110.2      | O1-C7-H7B     | 110.2 |
| C8-C7-H7B     | 110.2      | H7A-C7-H7B    | 108.5 |
| C7-C8-C9      | 115.90(13) | C7-C8-H8A     | 108.3 |
| C9-C8-H8A     | 108.3      | C7-C8-H8B     | 108.3 |
| C9-C8-H8B     | 108.3      | H8A-C8-H8B    | 107.4 |
| C8-C9-C10     | 111.98(13) | C8-C9-H9A     | 109.2 |
| C10-C9-H9A    | 109.2      | C8-C9-H9B     | 109.2 |
| C10-C9-H9B    | 109.2      | H9A-C9-H9B    | 107.9 |
| C11-C10-C9    | 114.00(13) | C11-C10-H10A  | 108.8 |
| C9-C10-H10A   | 108.8      | C11-C10-H10B  | 108.8 |
| C9-C10-H10B   | 108.8      | H10A-C10-H10B | 107.6 |
| C10-C11-C12   | 112.42(14) | C10-C11-H11A  | 109.1 |
| C12-C11-H11A  | 109.1      | C10-C11-H11B  | 109.1 |
| C12-C11-H11B  | 109.1      | H11A-C11-H11B | 107.9 |
| C11-C12-H12A  | 109.5      | C11-C12-H12B  | 109.5 |
| H12A-C12-H12B | 109.5      | C11-C12-H12C  | 109.5 |
| H12A-C12-H12C | 109.5      | H12B-C12-H12C | 109.5 |
| O2-C13-C14    | 106.57(12) | O2-C13-H13A   | 110.4 |

**Table S4. Bond angles (°) for bis(fulvene) 3.**

|               |            |               |            |
|---------------|------------|---------------|------------|
| C14-C13-H13A  | 110.4      | O2-C13-H13B   | 110.4      |
| C14-C13-H13B  | 110.4      | H13A-C13-H13B | 108.6      |
| C13-C14-C15   | 113.68(13) | C13-C14-H14A  | 108.8      |
| C15-C14-H14A  | 108.8      | C13-C14-H14B  | 108.8      |
| C15-C14-H14B  | 108.8      | H14A-C14-H14B | 107.7      |
| C16-C15-C14   | 113.65(12) | C16-C15-H15A  | 108.8      |
| C14-C15-H15A  | 108.8      | C16-C15-H15B  | 108.8      |
| C14-C15-H15B  | 108.8      | H15A-C15-H15B | 107.7      |
| C15-C16-C17   | 112.60(13) | C15-C16-H16A  | 109.1      |
| C17-C16-H16A  | 109.1      | C15-C16-H16B  | 109.1      |
| C17-C16-H16B  | 109.1      | H16A-C16-H16B | 107.8      |
| C16-C17-C18   | 113.96(14) | C16-C17-H17A  | 108.8      |
| C18-C17-H17A  | 108.8      | C16-C17-H17B  | 108.8      |
| C18-C17-H17B  | 108.8      | H17A-C17-H17B | 107.7      |
| C17-C18-H18A  | 109.5      | C17-C18-H18B  | 109.5      |
| H18A-C18-H18B | 109.5      | C17-C18-H18C  | 109.5      |
| H18A-C18-H18C | 109.5      | H18B-C18-H18C | 109.5      |
| C20-C19-C25   | 125.34(13) | C20-C19-C23   | 107.33(12) |

**Table S4. Bond angles (°) for bis(fulvene) 3.**

|             |            |             |            |
|-------------|------------|-------------|------------|
| C25-C19-C23 | 127.31(13) | C19-C20-C21 | 109.76(13) |
| C19-C20-H20 | 125.1      | C21-C20-H20 | 125.1      |
| C22-C21-C20 | 107.88(12) | C22-C21-C31 | 126.70(14) |
| C20-C21-C31 | 125.42(13) | C21-C22-C23 | 109.51(13) |
| C21-C22-H22 | 125.2      | C23-C22-H22 | 125.2      |
| C24-C23-C22 | 131.01(13) | C24-C23-C19 | 123.37(13) |
| C22-C23-C19 | 105.52(12) | C23-C24-C2  | 131.08(14) |
| C23-C24-H24 | 114.5      | C2-C24-H24  | 114.5      |
| C30-C25-C26 | 117.94(13) | C30-C25-C19 | 119.45(13) |
| C26-C25-C19 | 122.54(13) | C27-C26-C25 | 120.97(14) |
| C27-C26-H26 | 119.5      | C25-C26-H26 | 119.5      |
| C28-C27-C26 | 120.17(14) | C28-C27-H27 | 119.9      |
| C26-C27-H27 | 119.9      | C27-C28-C29 | 119.62(14) |
| C27-C28-H28 | 120.2      | C29-C28-H28 | 120.2      |
| C30-C29-C28 | 120.25(14) | C30-C29-H29 | 119.9      |
| C28-C29-H29 | 119.9      | C29-C30-C25 | 121.05(14) |
| C29-C30-H30 | 119.5      | C25-C30-H30 | 119.5      |
| C36-C31-C32 | 117.52(14) | C36-C31-C21 | 121.19(14) |

**Table S4. Bond angles (°) for bis(fulvene) 3.**

|             |            |             |            |
|-------------|------------|-------------|------------|
| C32-C31-C21 | 121.29(14) | C33-C32-C31 | 120.85(15) |
| C33-C32-H32 | 119.6      | C31-C32-H32 | 119.6      |
| C34-C33-C32 | 120.70(15) | C34-C33-H33 | 119.6      |
| C32-C33-H33 | 119.6      | C33-C34-C35 | 119.33(15) |
| C33-C34-H34 | 120.3      | C35-C34-H34 | 120.3      |
| C36-C35-C34 | 120.21(16) | C36-C35-H35 | 119.9      |
| C34-C35-H35 | 119.9      | C35-C36-C31 | 121.38(15) |
| C35-C36-H36 | 119.3      | C31-C36-H36 | 119.3      |
| C38-C37-C43 | 126.45(13) | C38-C37-C41 | 107.36(13) |
| C43-C37-C41 | 126.18(13) | C37-C38-C39 | 109.67(13) |
| C37-C38-H38 | 125.2      | C39-C38-H38 | 125.2      |
| C40-C39-C49 | 126.54(14) | C40-C39-C38 | 108.03(13) |
| C49-C39-C38 | 125.42(13) | C39-C40-C41 | 109.15(13) |
| C39-C40-H40 | 125.4      | C41-C40-H40 | 125.4      |
| C42-C41-C40 | 130.59(13) | C42-C41-C37 | 123.37(13) |
| C40-C41-C37 | 105.66(12) | C41-C42-C5  | 129.35(14) |
| C41-C42-H42 | 115.3      | C5-C42-H42  | 115.3      |
| C48-C43-C44 | 117.80(13) | C48-C43-C37 | 120.47(13) |

**Table S4. Bond angles (°) for bis(fulvene) 3.**

|             |            |             |            |
|-------------|------------|-------------|------------|
| C44-C43-C37 | 121.69(13) | C45-C44-C43 | 121.15(14) |
| C45-C44-H44 | 119.4      | C43-C44-H44 | 119.4      |
| C44-C45-C46 | 120.38(14) | C44-C45-H45 | 119.8      |
| C46-C45-H45 | 119.8      | C45-C46-C47 | 119.33(14) |
| C45-C46-H46 | 120.3      | C47-C46-H46 | 120.3      |
| C48-C47-C46 | 120.39(15) | C48-C47-H47 | 119.8      |
| C46-C47-H47 | 119.8      | C47-C48-C43 | 120.95(14) |
| C47-C48-H48 | 119.5      | C43-C48-H48 | 119.5      |
| C54-C49-C50 | 117.69(14) | C54-C49-C39 | 121.34(14) |
| C50-C49-C39 | 120.96(14) | C51-C50-C49 | 121.37(16) |
| C51-C50-H50 | 119.3      | C49-C50-H50 | 119.3      |
| C52-C51-C50 | 120.05(16) | C52-C51-H51 | 120.0      |
| C50-C51-H51 | 120.0      | C51-C52-C53 | 119.48(15) |
| C51-C52-H52 | 120.3      | C53-C52-H52 | 120.3      |
| C52-C53-C54 | 120.38(17) | C52-C53-H53 | 119.8      |
| C54-C53-H53 | 119.8      | C53-C54-C49 | 121.01(16) |
| C53-C54-H54 | 119.5      | C49-C54-H54 | 119.5      |

**Table S5. Torsion angles (°) for bis(fulvene) 3.**

|                 |             |                 |             |
|-----------------|-------------|-----------------|-------------|
| C7-O1-C1-C6     | 28.7(2)     | C7-O1-C1-C2     | -156.17(13) |
| O1-C1-C2-C3     | -172.67(13) | C6-C1-C2-C3     | 2.5(2)      |
| O1-C1-C2-C24    | 10.1(2)     | C6-C1-C2-C24    | -174.72(13) |
| C1-C2-C3-C4     | -0.2(2)     | C24-C2-C3-C4    | 176.89(14)  |
| C13-O2-C4-C3    | -17.4(2)    | C13-O2-C4-C5    | 164.13(13)  |
| C2-C3-C4-O2     | 178.90(13)  | C2-C3-C4-C5     | -2.7(2)     |
| O2-C4-C5-C6     | -178.33(13) | C3-C4-C5-C6     | 3.2(2)      |
| O2-C4-C5-C42    | -4.7(2)     | C3-C4-C5-C42    | 176.81(13)  |
| O1-C1-C6-C5     | 172.85(13)  | C2-C1-C6-C5     | -2.0(2)     |
| C4-C5-C6-C1     | -0.8(2)     | C42-C5-C6-C1    | -174.20(14) |
| C1-O1-C7-C8     | -168.37(13) | O1-C7-C8-C9     | -57.69(18)  |
| C7-C8-C9-C10    | -178.54(13) | C8-C9-C10-C11   | -176.52(13) |
| C9-C10-C11-C12  | -174.38(14) | C4-O2-C13-C14   | -166.56(12) |
| O2-C13-C14-C15  | -58.48(17)  | C13-C14-C15-C16 | 179.95(13)  |
| C14-C15-C16-C17 | 177.07(14)  | C15-C16-C17-C18 | 176.39(14)  |
| C25-C19-C20-C21 | 178.42(13)  | C23-C19-C20-C21 | -0.07(16)   |
| C19-C20-C21-C22 | 0.05(17)    | C19-C20-C21-C31 | -179.53(13) |
| C20-C21-C22-C23 | 0.00(16)    | C31-C21-C22-C23 | 179.56(13)  |
| C21-C22-C23-C24 | 176.32(15)  | C21-C22-C23-C19 | -0.04(16)   |
| C20-C19-C23-C24 | -176.65(13) | C25-C19-C23-C24 | 4.9(2)      |

**Table S5. Torsion angles (°) for bis(fulvene) 3.**

|                 |             |                 |             |
|-----------------|-------------|-----------------|-------------|
| C20-C19-C23-C22 | 0.06(15)    | C25-C19-C23-C22 | -178.39(13) |
| C22-C23-C24-C2  | 7.7(3)      | C19-C23-C24-C2  | -176.46(14) |
| C3-C2-C24-C23   | 9.7(2)      | C1-C2-C24-C23   | -173.25(15) |
| C20-C19-C25-C30 | 39.4(2)     | C23-C19-C25-C30 | -142.42(15) |
| C20-C19-C25-C26 | -137.47(16) | C23-C19-C25-C26 | 40.7(2)     |
| C30-C25-C26-C27 | 0.4(2)      | C19-C25-C26-C27 | 177.35(14)  |
| C25-C26-C27-C28 | -0.5(2)     | C26-C27-C28-C29 | 0.0(2)      |
| C27-C28-C29-C30 | 0.5(2)      | C28-C29-C30-C25 | -0.5(2)     |
| C26-C25-C30-C29 | 0.0(2)      | C19-C25-C30-C29 | -176.97(14) |
| C22-C21-C31-C36 | -5.0(2)     | C20-C21-C31-C36 | 174.50(14)  |
| C22-C21-C31-C32 | 174.95(15)  | C20-C21-C31-C32 | -5.6(2)     |
| C36-C31-C32-C33 | -0.1(2)     | C21-C31-C32-C33 | 179.96(14)  |
| C31-C32-C33-C34 | -0.2(2)     | C32-C33-C34-C35 | 0.2(3)      |
| C33-C34-C35-C36 | 0.1(3)      | C34-C35-C36-C31 | -0.5(3)     |
| C32-C31-C36-C35 | 0.5(2)      | C21-C31-C36-C35 | -179.59(15) |
| C43-C37-C38-C39 | 177.92(13)  | C41-C37-C38-C39 | -2.80(16)   |
| C37-C38-C39-C40 | 0.70(17)    | C37-C38-C39-C49 | -178.05(14) |
| C49-C39-C40-C41 | -179.48(14) | C38-C39-C40-C41 | 1.78(16)    |
| C39-C40-C41-C42 | 169.60(15)  | C39-C40-C41-C37 | -3.39(16)   |
| C38-C37-C41-C42 | -169.86(14) | C43-C37-C41-C42 | 9.4(2)      |

**Table S5. Torsion angles (°) for bis(fulvene) 3.**

|                 |             |                 |             |
|-----------------|-------------|-----------------|-------------|
| C38-C37-C41-C40 | 3.78(16)    | C43-C37-C41-C40 | -176.94(13) |
| C40-C41-C42-C5  | -2.3(3)     | C37-C41-C42-C5  | 169.63(14)  |
| C6-C5-C42-C41   | -19.7(2)    | C4-C5-C42-C41   | 167.10(14)  |
| C38-C37-C43-C48 | 42.7(2)     | C41-C37-C43-C48 | -136.45(15) |
| C38-C37-C43-C44 | -134.91(16) | C41-C37-C43-C44 | 45.9(2)     |
| C48-C43-C44-C45 | -0.3(2)     | C37-C43-C44-C45 | 177.41(13)  |
| C43-C44-C45-C46 | 0.3(2)      | C44-C45-C46-C47 | -0.4(2)     |
| C45-C46-C47-C48 | 0.5(2)      | C46-C47-C48-C43 | -0.4(2)     |
| C44-C43-C48-C47 | 0.3(2)      | C37-C43-C48-C47 | -177.39(14) |
| C40-C39-C49-C54 | 17.2(2)     | C38-C39-C49-C54 | -164.31(14) |
| C40-C39-C49-C50 | -161.62(15) | C38-C39-C49-C50 | 16.9(2)     |
| C54-C49-C50-C51 | -1.4(2)     | C39-C49-C50-C51 | 177.40(14)  |
| C49-C50-C51-C52 | 0.5(2)      | C50-C51-C52-C53 | 0.8(2)      |
| C51-C52-C53-C54 | -1.1(3)     | C52-C53-C54-C49 | 0.2(3)      |
|                 |             |                 | -177.73(15) |
| C50-C49-C54-C53 | 1.1(2)      | C39-C49-C54-C53 |             |

**Table S6. Anisotropic atomic displacement parameters (Å<sup>2</sup>) for bis(fulvene) 3.**

The anisotropic atomic displacement factor exponent takes the form:  $-2\pi^2 [ h^2 a^{*2} U_{11} + \dots + 2 h k a^* b^* U_{12} ]$

 $U_{11}$  $U_{22}$  $U_{33}$  $U_{23}$  $U_{13}$  $U_{12}$



|    |           |           |           |           |            |            |
|----|-----------|-----------|-----------|-----------|------------|------------|
| O1 | 0.0387(7) | 0.0140(5) | 0.0300(6) | 0.0060(5) | -0.0204(5) | -0.0118(5) |
| O2 | 0.0384(6) | 0.0160(5) | 0.0277(6) | 0.0069(5) | -0.0179(5) | -0.0136(5) |

**Table S6. Anisotropic atomic displacement parameters ( $\text{\AA}^2$ ) for bis(fulvene) 3.**

The anisotropic atomic displacement factor exponent takes the form:  $-2\pi^2[ h^2 a^{*2} U_{11} + \dots + 2 h k a^* b^* U_{12} ]$

|     |            |           |            |            |            |            |
|-----|------------|-----------|------------|------------|------------|------------|
| C1  | 0.0221(7)  | 0.0121(7) | 0.0201(7)  | 0.0000(6)  | -0.0072(6) | -0.0032(6) |
| C2  | 0.0173(7)  | 0.0137(7) | 0.0173(7)  | -0.0028(6) | -0.0037(6) | -0.0020(5) |
| C3  | 0.0221(7)  | 0.0134(7) | 0.0210(7)  | -0.0023(6) | -0.0075(6) | -0.0044(6) |
| C4  | 0.0212(7)  | 0.0125(7) | 0.0188(7)  | 0.0011(6)  | -0.0060(6) | -0.0026(6) |
| C5  | 0.0170(7)  | 0.0152(7) | 0.0163(7)  | -0.0027(6) | -0.0048(5) | -0.0020(5) |
| C6  | 0.0235(7)  | 0.0131(7) | 0.0225(8)  | -0.0023(6) | -0.0086(6) | -0.0057(6) |
| C7  | 0.0306(8)  | 0.0162(8) | 0.0236(8)  | 0.0000(6)  | -0.0106(7) | -0.0094(6) |
| C8  | 0.0363(9)  | 0.0141(8) | 0.0291(9)  | 0.0004(6)  | -0.0114(7) | -0.0079(6) |
| C9  | 0.0271(8)  | 0.0160(8) | 0.0251(8)  | -0.0004(6) | -0.0068(6) | -0.0048(6) |
| C10 | 0.0270(8)  | 0.0137(7) | 0.0287(8)  | 0.0013(6)  | -0.0094(7) | -0.0042(6) |
| C11 | 0.0320(9)  | 0.0189(8) | 0.0299(9)  | 0.0000(7)  | -0.0068(7) | -0.0055(7) |
| C12 | 0.0435(10) | 0.0238(9) | 0.0344(10) | 0.0040(7)  | -0.0147(8) | -0.0039(8) |
| C13 | 0.0272(8)  | 0.0174(8) | 0.0266(8)  | 0.0003(6)  | -0.0105(7) | -0.0087(6) |
| C14 | 0.0263(8)  | 0.0172(8) | 0.0272(8)  | 0.0023(6)  | -0.0064(7) | -0.0077(6) |
| C15 | 0.0249(8)  | 0.0160(8) | 0.0263(8)  | 0.0008(6)  | -0.0048(6) | -0.0050(6) |

|     |           |           |           |            |            |            |
|-----|-----------|-----------|-----------|------------|------------|------------|
| C16 | 0.0266(8) | 0.0165(8) | 0.0250(8) | -0.0007(6) | -0.0046(6) | -0.0054(6) |
|-----|-----------|-----------|-----------|------------|------------|------------|

**Table S6. Anisotropic atomic displacement parameters ( $\text{\AA}^2$ ) for bis(fulvene) 3.**

The anisotropic atomic displacement factor exponent takes the form:  $-2\pi^2[ h^2 a^{*2} U_{11} + \dots + 2 h k a^* b^* U_{12} ]$

|     |            |            |            |            |            |            |
|-----|------------|------------|------------|------------|------------|------------|
| C17 | 0.0290(9)  | 0.0245(9)  | 0.0326(9)  | 0.0020(7)  | -0.0057(7) | -0.0002(7) |
| C18 | 0.0376(10) | 0.0313(10) | 0.0363(10) | 0.0054(8)  | -0.0131(8) | -0.0005(8) |
| C19 | 0.0188(7)  | 0.0145(7)  | 0.0172(7)  | -0.0030(6) | -0.0048(6) | -0.0012(5) |
| C20 | 0.0200(7)  | 0.0183(7)  | 0.0182(7)  | -0.0042(6) | -0.0060(6) | -0.0037(6) |
| C21 | 0.0174(7)  | 0.0161(7)  | 0.0198(7)  | -0.0020(6) | -0.0042(6) | -0.0030(6) |
| C22 | 0.0204(7)  | 0.0168(7)  | 0.0183(7)  | -0.0005(6) | -0.0054(6) | -0.0042(6) |
| C23 | 0.0173(7)  | 0.0146(7)  | 0.0176(7)  | -0.0029(6) | -0.0050(6) | -0.0015(5) |
| C24 | 0.0183(7)  | 0.0134(7)  | 0.0194(7)  | -0.0014(6) | -0.0056(6) | -0.0010(5) |
| C25 | 0.0225(7)  | 0.0142(7)  | 0.0185(7)  | -0.0039(6) | -0.0058(6) | -0.0032(6) |
| C26 | 0.0234(8)  | 0.0156(7)  | 0.0198(7)  | -0.0037(6) | -0.0084(6) | -0.0015(6) |
| C27 | 0.0270(8)  | 0.0187(8)  | 0.0236(8)  | -0.0037(6) | -0.0068(6) | -0.0076(6) |
| C28 | 0.0358(9)  | 0.0173(8)  | 0.0259(8)  | 0.0029(7)  | -0.0109(7) | -0.0090(7) |
| C29 | 0.0323(9)  | 0.0212(8)  | 0.0315(9)  | 0.0045(7)  | -0.0172(7) | -0.0053(7) |
| C30 | 0.0235(8)  | 0.0187(8)  | 0.0284(8)  | -0.0010(6) | -0.0105(6) | -0.0049(6) |
| C31 | 0.0176(7)  | 0.0177(7)  | 0.0225(8)  | -0.0059(6) | -0.0024(6) | -0.0029(6) |
| C32 | 0.0244(8)  | 0.0191(8)  | 0.0261(8)  | -0.0045(6) | -0.0068(6) | -0.0045(6) |

**Table S6. Anisotropic atomic displacement parameters ( $\text{\AA}^2$ ) for bis(fulvene) 3.**

The anisotropic atomic displacement factor exponent takes the form:  $-2\pi^2[ h^2 a^{*2} U_{11} + \dots + 2 h k a^* b^* U_{12} ]$

|     |            |           |            |            |            |            |
|-----|------------|-----------|------------|------------|------------|------------|
| C33 | 0.0296(9)  | 0.0247(9) | 0.0331(9)  | -0.0106(7) | -0.0077(7) | -0.0088(7) |
| C34 | 0.0349(9)  | 0.0225(9) | 0.0346(10) | -0.0083(7) | -0.0019(7) | -0.0132(7) |
| C35 | 0.0429(10) | 0.0241(9) | 0.0282(9)  | 0.0008(7)  | -0.0041(8) | -0.0150(8) |
| C36 | 0.0330(9)  | 0.0232(8) | 0.0251(8)  | -0.0016(7) | -0.0077(7) | -0.0113(7) |
| C37 | 0.0192(7)  | 0.0148(7) | 0.0186(7)  | -0.0024(6) | -0.0064(6) | -0.0010(6) |
| C38 | 0.0224(7)  | 0.0164(7) | 0.0211(8)  | -0.0032(6) | -0.0083(6) | -0.0024(6) |
| C39 | 0.0183(7)  | 0.0166(7) | 0.0206(7)  | -0.0022(6) | -0.0044(6) | -0.0030(6) |
| C40 | 0.0196(7)  | 0.0199(8) | 0.0190(7)  | -0.0008(6) | -0.0056(6) | -0.0035(6) |
| C41 | 0.0181(7)  | 0.0153(7) | 0.0189(7)  | -0.0032(6) | -0.0044(6) | -0.0005(5) |
| C42 | 0.0195(7)  | 0.0135(7) | 0.0169(7)  | -0.0016(6) | -0.0047(6) | -0.0007(5) |
| C43 | 0.0187(7)  | 0.0156(7) | 0.0195(7)  | -0.0011(6) | -0.0089(6) | -0.0021(6) |
| C44 | 0.0241(8)  | 0.0164(7) | 0.0203(7)  | -0.0037(6) | -0.0091(6) | -0.0005(6) |
| C45 | 0.0283(8)  | 0.0141(7) | 0.0301(9)  | -0.0023(6) | -0.0136(7) | -0.0010(6) |
| C46 | 0.0256(8)  | 0.0193(8) | 0.0263(8)  | 0.0036(7)  | -0.0101(7) | -0.0063(6) |
| C47 | 0.0274(8)  | 0.0225(8) | 0.0201(8)  | -0.0023(6) | -0.0057(6) | -0.0038(6) |
| C48 | 0.0257(8)  | 0.0144(7) | 0.0228(8)  | -0.0031(6) | -0.0077(6) | -0.0024(6) |

**Table S6. Anisotropic atomic displacement parameters ( $\text{\AA}^2$ ) for bis(fulvene) 3.**

The anisotropic atomic displacement factor exponent takes the form:  $-2\pi^2[ h^2 a^{*2} U_{11} + \dots + 2 h k a^* b^* U_{12} ]$

|     |            |           |            |            |            |            |
|-----|------------|-----------|------------|------------|------------|------------|
| C49 | 0.0199(7)  | 0.0161(7) | 0.0243(8)  | -0.0049(6) | -0.0026(6) | -0.0030(6) |
| C50 | 0.0244(8)  | 0.0182(8) | 0.0333(9)  | -0.0059(7) | -0.0079(7) | -0.0027(6) |
| C51 | 0.0265(8)  | 0.0197(8) | 0.0460(11) | -0.0125(8) | -0.0075(8) | -0.0042(6) |
| C52 | 0.0310(9)  | 0.0187(8) | 0.0433(11) | -0.0102(8) | 0.0035(8)  | -0.0099(7) |
| C53 | 0.0441(11) | 0.0210(9) | 0.0321(10) | -0.0005(7) | 0.0011(8)  | -0.0122(8) |
| C54 | 0.0342(9)  | 0.0247(9) | 0.0268(9)  | -0.0033(7) | -0.0052(7) | -0.0104(7) |

**Table S7. Hydrogen atomic coordinates and isotropic atomic displacement parameters ( $\text{\AA}^2$ ) for bis(fulvene) 3.**

|      | x/a    | y/b    | z/c    | U(eq) |
|------|--------|--------|--------|-------|
| H3   | 0.6595 | 0.3718 | 0.4744 | 0.022 |
| H6   | 0.8277 | 0.6277 | 0.5369 | 0.022 |
| H7A  | 0.9053 | 0.7210 | 0.3568 | 0.027 |
| H7B  | 0.8168 | 0.7501 | 0.4528 | 0.027 |
| H8A  | 0.8120 | 0.8883 | 0.3417 | 0.031 |
| H8B  | 0.6580 | 0.8650 | 0.3844 | 0.031 |
| H9A  | 0.6631 | 0.7975 | 0.2557 | 0.027 |
| H9B  | 0.8191 | 0.8180 | 0.2131 | 0.027 |
| H10A | 0.5832 | 0.9694 | 0.2525 | 0.028 |
| H10B | 0.7387 | 0.9872 | 0.2046 | 0.028 |

**Table S7. Hydrogen atomic coordinates and isotropic atomic displacement parameters ( $\text{\AA}^2$ ) for bis(fulvene) 3.**

|      | x/a    | y/b     | z/c    | U(eq) |
|------|--------|---------|--------|-------|
| H11A | 0.5636 | 0.9098  | 0.1267 | 0.033 |
| H11B | 0.7237 | 0.9163  | 0.0795 | 0.033 |
| H12A | 0.5753 | 1.0498  | 0.0182 | 0.051 |
| H12B | 0.6707 | 1.0882  | 0.0677 | 0.051 |
| H12C | 0.5108 | 1.0821  | 0.1157 | 0.051 |
| H13A | 0.7010 | 0.2263  | 0.5699 | 0.027 |
| H13B | 0.5645 | 0.2948  | 0.6189 | 0.027 |
| H14A | 0.5989 | 0.1419  | 0.7094 | 0.028 |
| H14B | 0.6113 | 0.2267  | 0.7602 | 0.028 |
| H15A | 0.8466 | 0.1017  | 0.6693 | 0.027 |
| H15B | 0.8590 | 0.1865  | 0.7200 | 0.027 |
| H16A | 0.7360 | 0.0199  | 0.8098 | 0.028 |
| H16B | 0.7570 | 0.1032  | 0.8592 | 0.028 |
| H17A | 1.0047 | 0.0587  | 0.8090 | 0.037 |
| H17B | 0.9795 | -0.0280 | 0.7657 | 0.037 |

**Table S7. Hydrogen atomic coordinates and isotropic atomic displacement parameters ( $\text{\AA}^2$ ) for bis(fulvene) 3.**

|      |        |         |        |       |
|------|--------|---------|--------|-------|
| H18A | 1.0392 | -0.0889 | 0.9050 | 0.055 |
| H18B | 0.8834 | -0.1042 | 0.9109 | 0.055 |
| H18C | 0.9081 | -0.0174 | 0.9542 | 0.055 |

**Table S7. Hydrogen atomic coordinates and isotropic atomic displacement parameters ( $\text{\AA}^2$ ) for bis(fulvene) 3.**

|     | x/a    | y/b    | z/c     | U(eq) |
|-----|--------|--------|---------|-------|
| H20 | 0.4478 | 0.4265 | 0.1567  | 0.022 |
| H22 | 0.5278 | 0.3491 | 0.4075  | 0.022 |
| H24 | 0.6616 | 0.5863 | 0.3056  | 0.021 |
| H26 | 0.7852 | 0.5748 | 0.1661  | 0.023 |
| H27 | 0.8437 | 0.7013 | 0.0521  | 0.027 |
| H28 | 0.6845 | 0.7817 | -0.0356 | 0.031 |
| H29 | 0.4662 | 0.7345 | -0.0085 | 0.033 |
| H30 | 0.4058 | 0.6097 | 0.1066  | 0.027 |
| H32 | 0.3258 | 0.3014 | 0.1879  | 0.027 |
| H33 | 0.2173 | 0.1663 | 0.2116  | 0.033 |
| H34 | 0.2205 | 0.0531 | 0.3409  | 0.036 |
| H35 | 0.3328 | 0.0763 | 0.4482  | 0.038 |
| H36 | 0.4395 | 0.2118 | 0.4261  | 0.031 |
| H38 | 1.0203 | 0.6039 | 0.8451  | 0.023 |
| H40 | 0.9936 | 0.6345 | 0.5828  | 0.023 |
| H42 | 0.8130 | 0.4225 | 0.7109  | 0.02  |
| H44 | 0.9681 | 0.3252 | 0.7902  | 0.024 |
| H45 | 0.9083 | 0.2042 | 0.9091  | 0.028 |
| H46 | 0.7970 | 0.2444 | 1.0523  | 0.028 |

**Table S7. Hydrogen atomic coordinates and isotropic atomic displacement parameters ( $\text{\AA}^2$ ) for bis(fulvene) 3.**

|     | x/a    | y/b    | z/c    | U(eq) |
|-----|--------|--------|--------|-------|
| H47 | 0.7489 | 0.4074 | 1.0758 | 0.028 |
| H48 | 0.8081 | 0.5291 | 0.9570 | 0.025 |
| H50 | 1.1808 | 0.7100 | 0.7940 | 0.03  |
| H51 | 1.3015 | 0.8405 | 0.7574 | 0.036 |
| H52 | 1.2948 | 0.9464 | 0.6234 | 0.038 |
| H53 | 1.1623 | 0.9227 | 0.5279 | 0.04  |
| H54 | 1.0432 | 0.7914 | 0.5636 | 0.034 |

## Computational Methods and Results

All calculations were performed using Gaussian 09<sup>8</sup> and GaussView 05.<sup>9</sup> Density-functional geometry optimizations and vibrational frequency calculations were performed using Becke's three-parameter exchange functional<sup>10</sup> along with the local/non-local correlation functional by Lee, Yang, and Parr<sup>11</sup> in conjunction with the standard 6-311G basis set.<sup>12</sup> Minimum-energy geometries were confirmed by the presence of no imaginary vibrational frequencies. Electronic excited state and subsequent spectrum calculations were performed using time-dependent DFT calculations using the same functional and basis set. Only singlet states were included in the excited state calculations.

All four molecular geometries were optimized with no imaginary vibrational frequencies. The gas-phase geometries show a 22 - 29° angle between the central group and the fulvene ring planes, somewhat larger than seen in the crystal structures. Calculations of the UV-vis spectra show an average deviation of 35 nm for the predicted  $\lambda_{\text{max}}$  of the most low energy peak (Table S8). However, because the HOMO-LUMO transition typically has a lower extinction coefficient, the HOMO-LUMO gap does not necessarily track with  $\lambda_{\text{max}}$  (Table S8). Plots of the HOMOs and LUMOs for **1** – **4** are shown below. The plots show that the fulvene moiety contains significant electron probability for both HOMO and LUMO for all four derivatives, although in **4** the thiophene ring also has significant electronic population. In **4**, both the HOMO and LUMO extend over most of the molecule, whereas in the other molecules both the HOMO and LUMO are more localized. This may account for its relatively low HOMO-LUMO gap.

**Table S8. Comparison of calculated and experimental (UV-Vis) data for bis(fulvenes) 1-4.**

| Fulvene | $\lambda_{\text{max}}$ (calculated), nm | $\Delta(\text{Theo} - \text{Expt})$ , nm | HOMO-LUMO Gap, eV |
|---------|-----------------------------------------|------------------------------------------|-------------------|
|---------|-----------------------------------------|------------------------------------------|-------------------|

|          |     |     |      |
|----------|-----|-----|------|
| <b>1</b> | 440 | +35 | 2.13 |
| <b>2</b> | 456 | +32 | 2.29 |
| <b>3</b> | 435 | -22 | 2.16 |
| <b>4</b> | 563 | +54 | 1.91 |

## Calculated UV-Vis Spectra



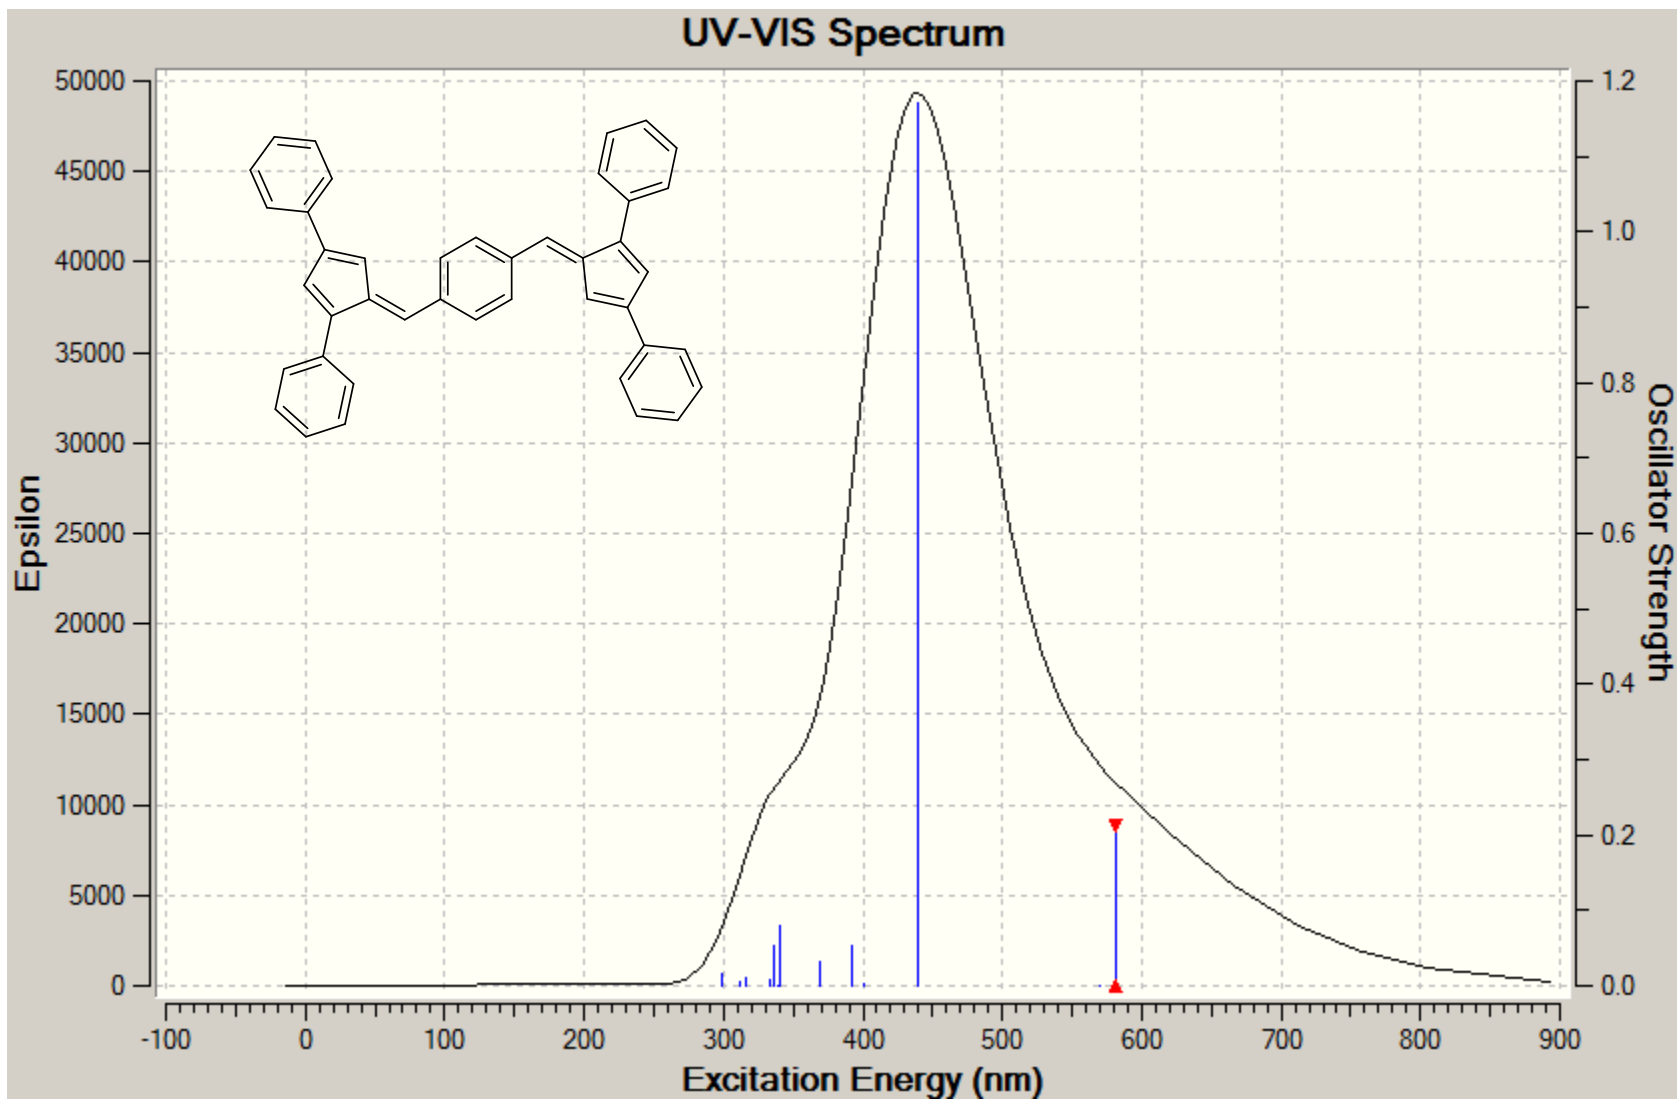

**Figure S13. Calculated UV-Vis spectrum of bis(fulvene) 1.**

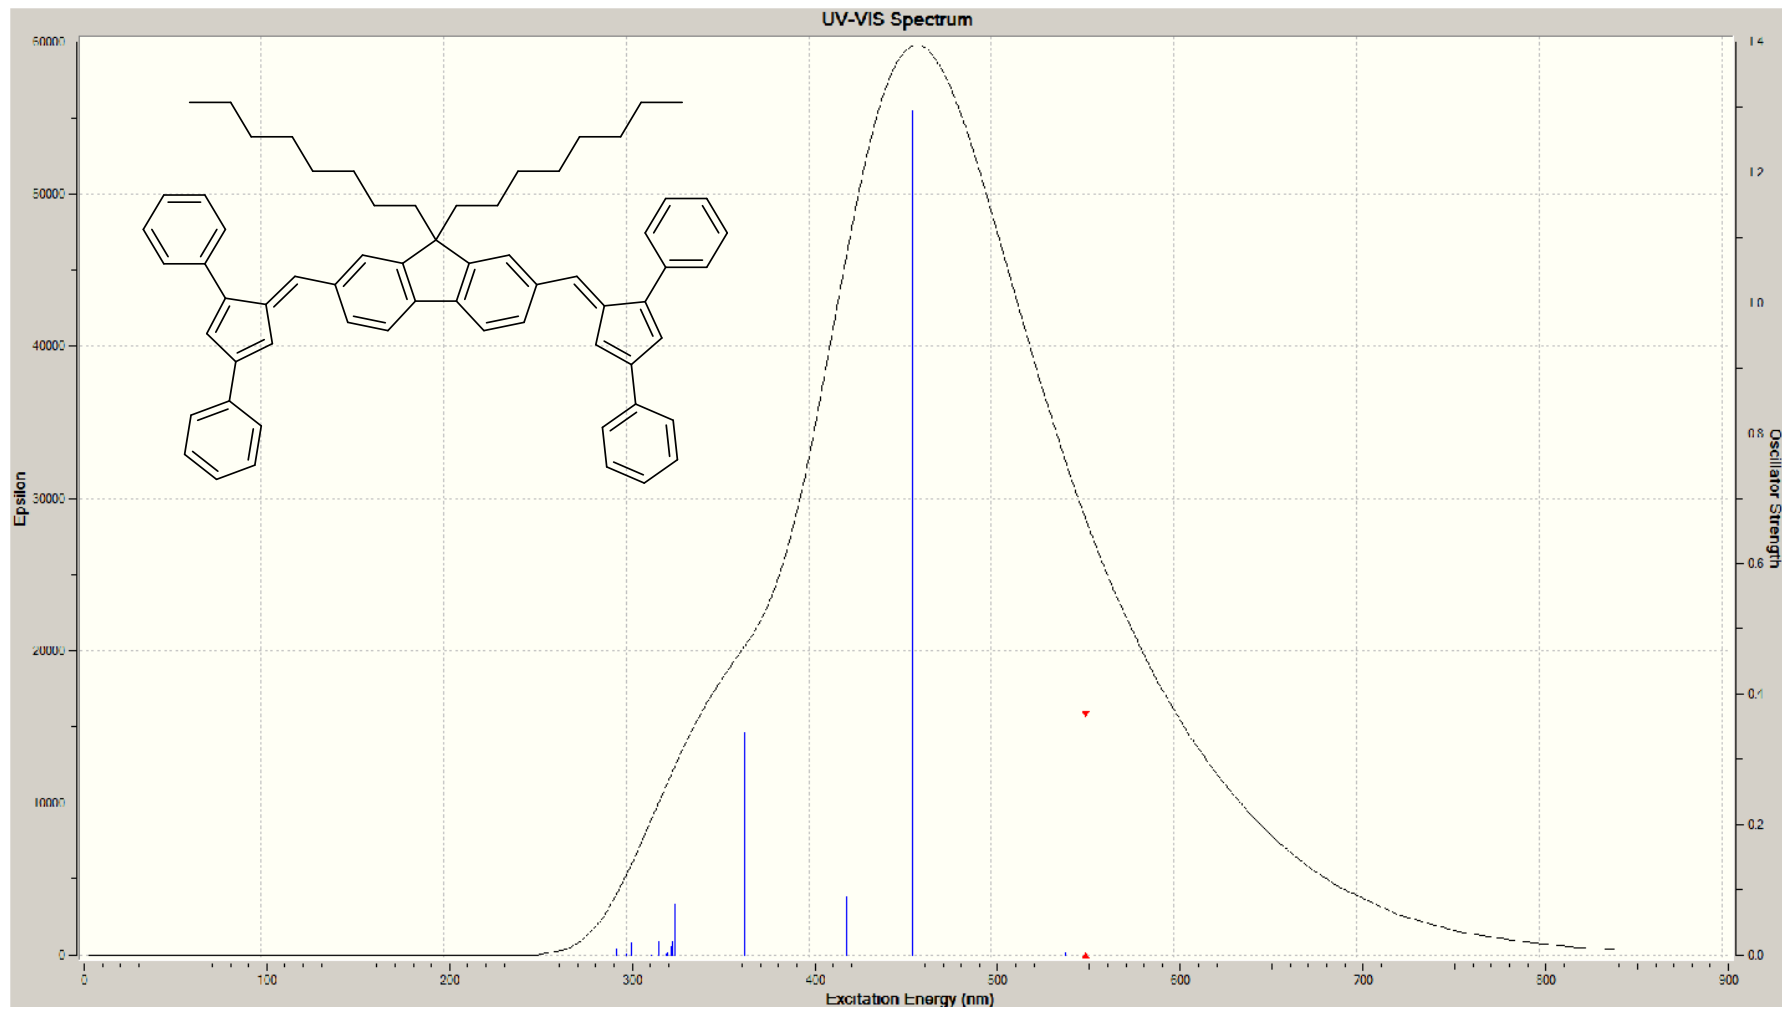

Figure S14. Calculated UV-Vis spectrum of bis(fulvene) 2.

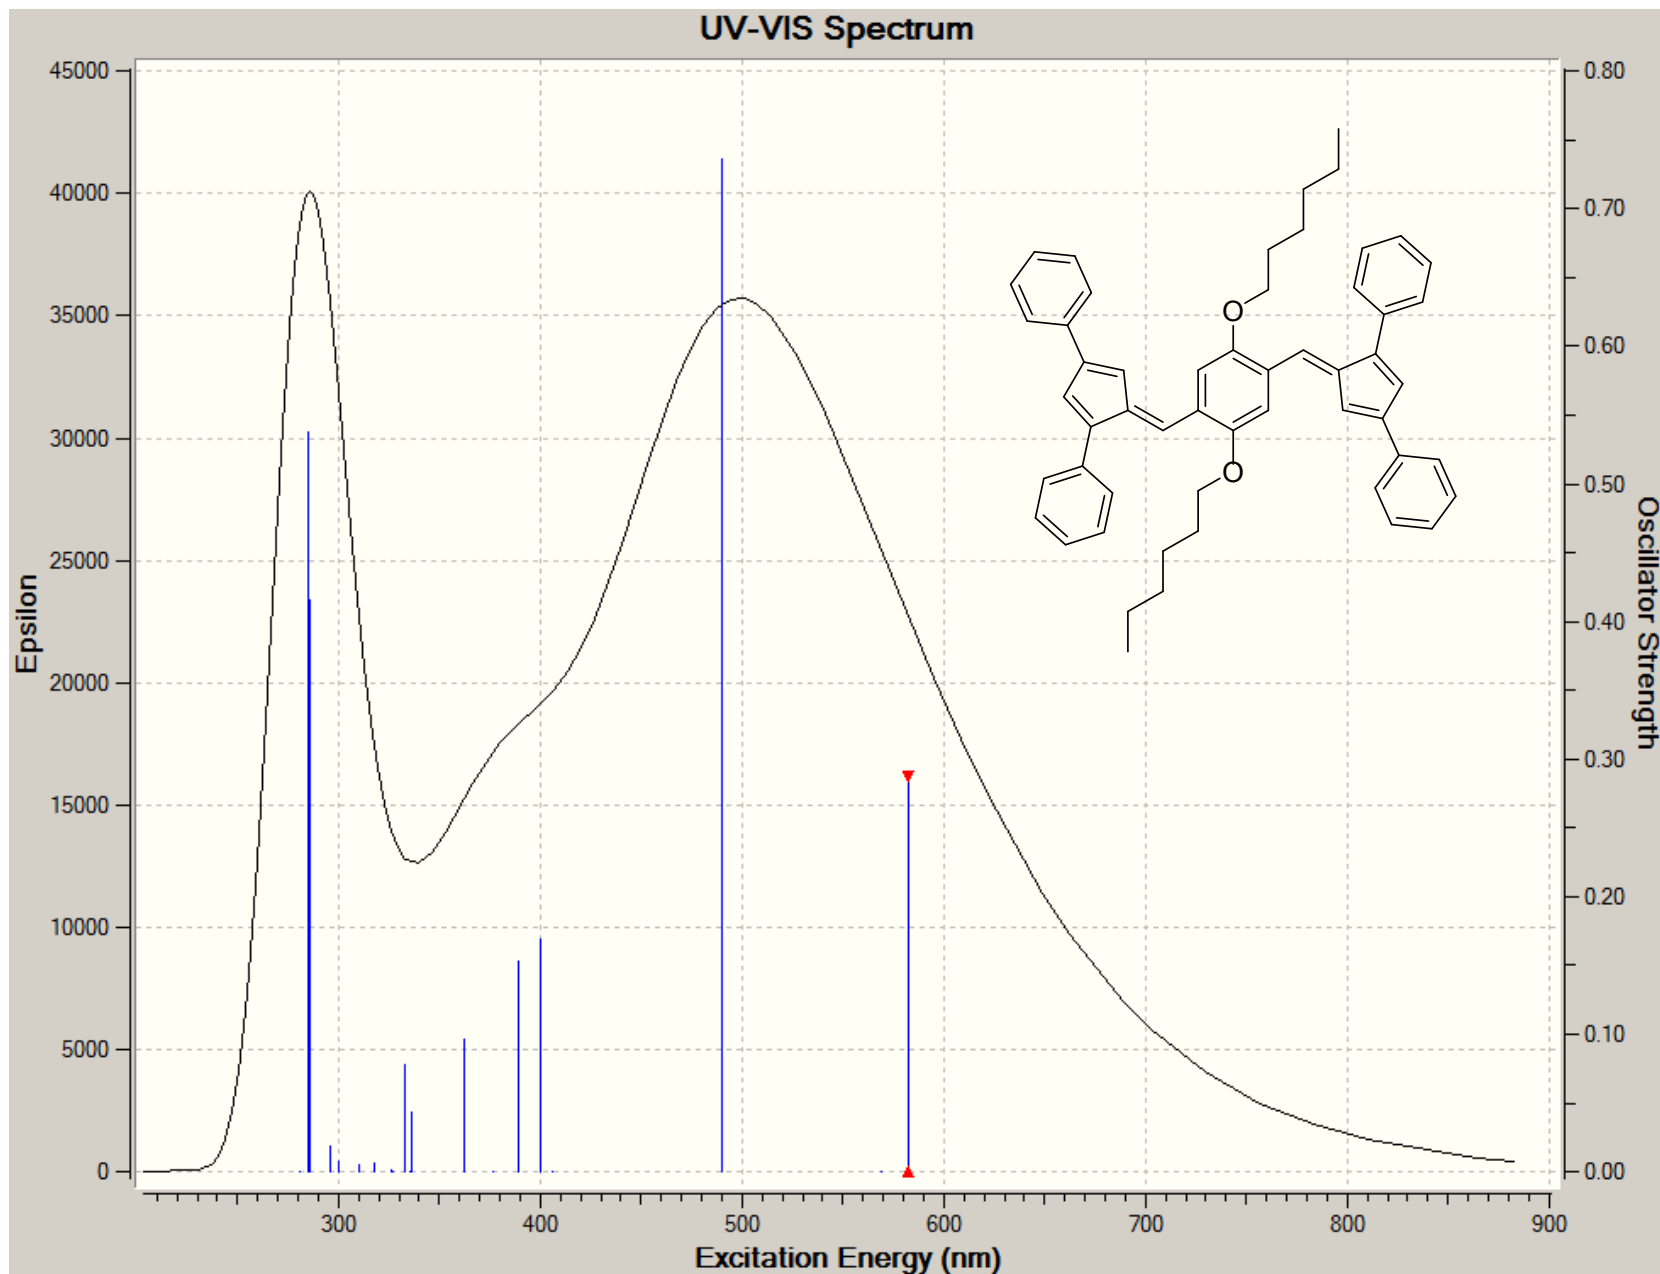

Figure S15. Calculated UV-Vis spectrum of bis(fulvene) 3.

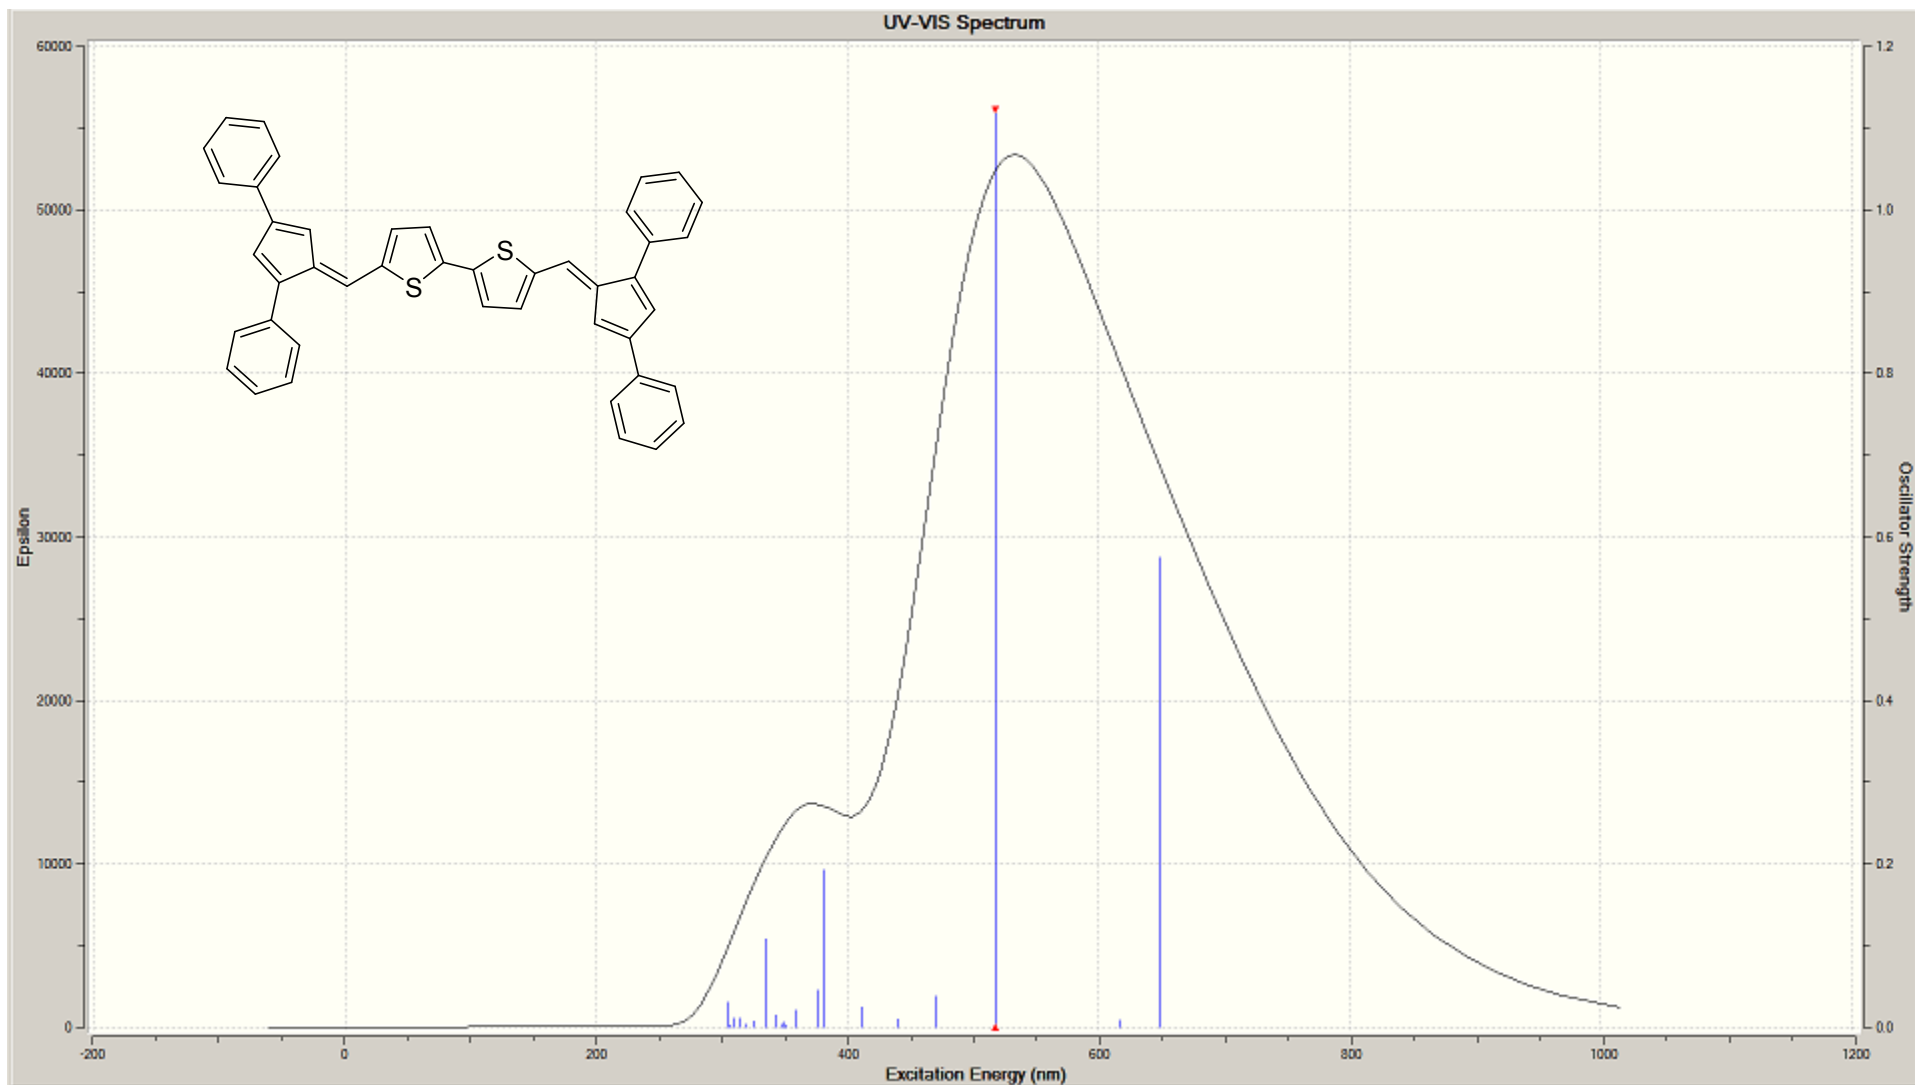

Figure S16. Calculated UV-Vis spectrum of bis(fulvene) 4.

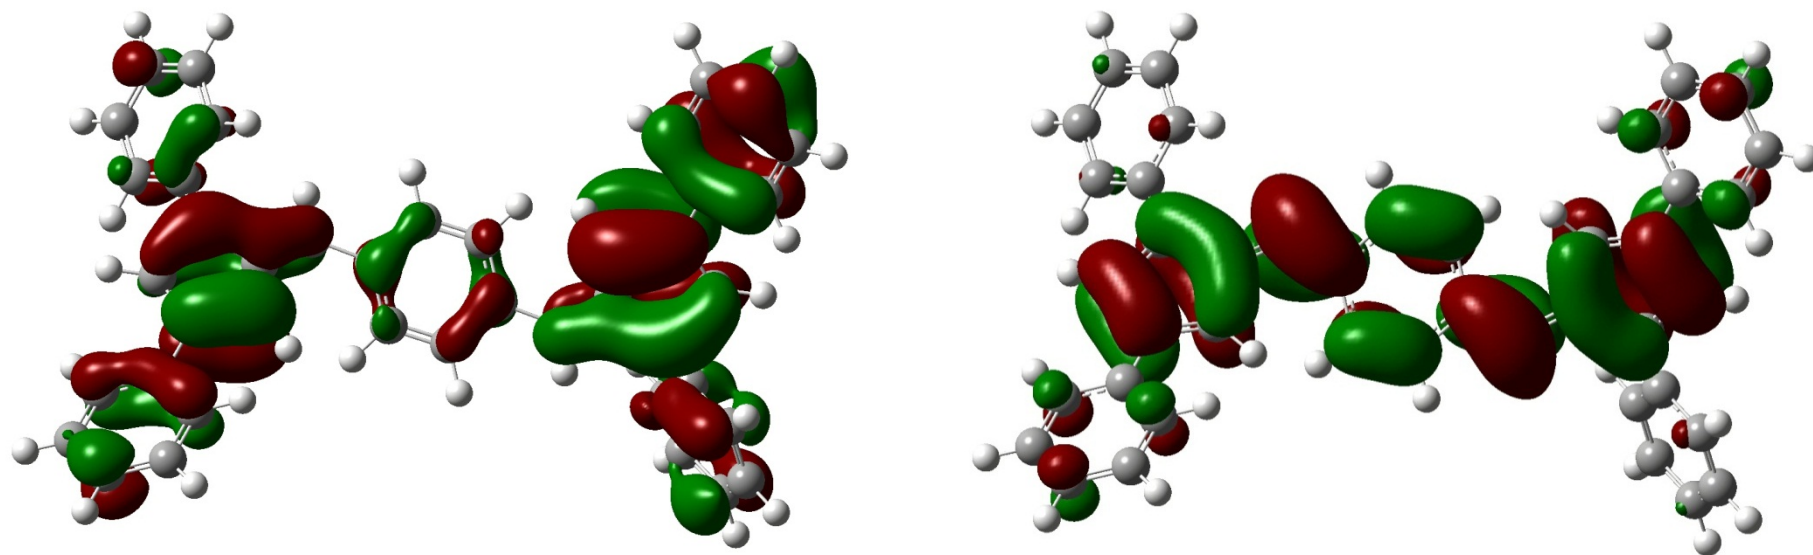

**Figure S17. HOMO (left) and LUMO (right) plots of bis(fulvene) 1.**

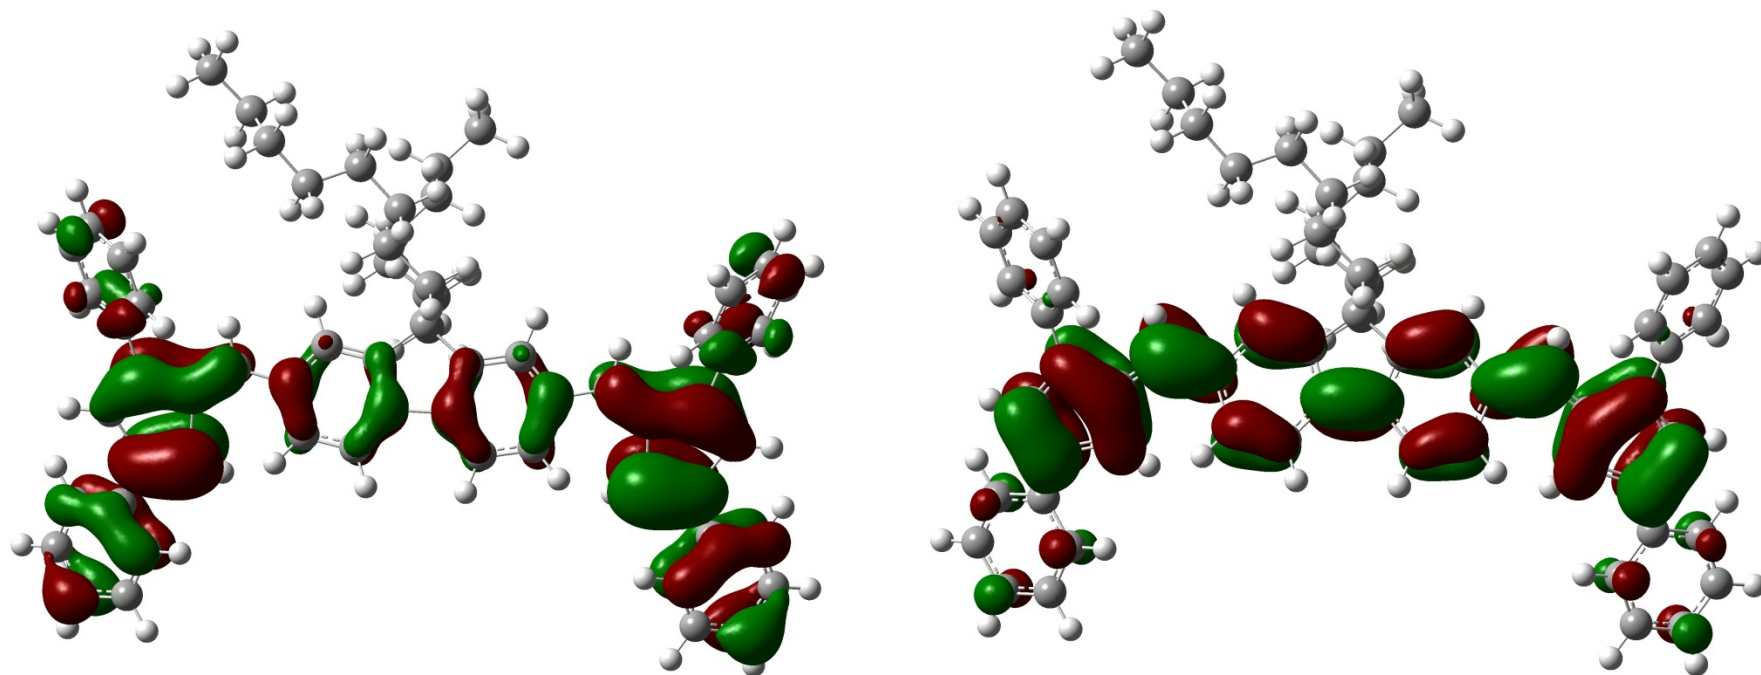

**Figure S18. HOMO (left) and LUMO (right) plots of bis(fulvene) 2.**

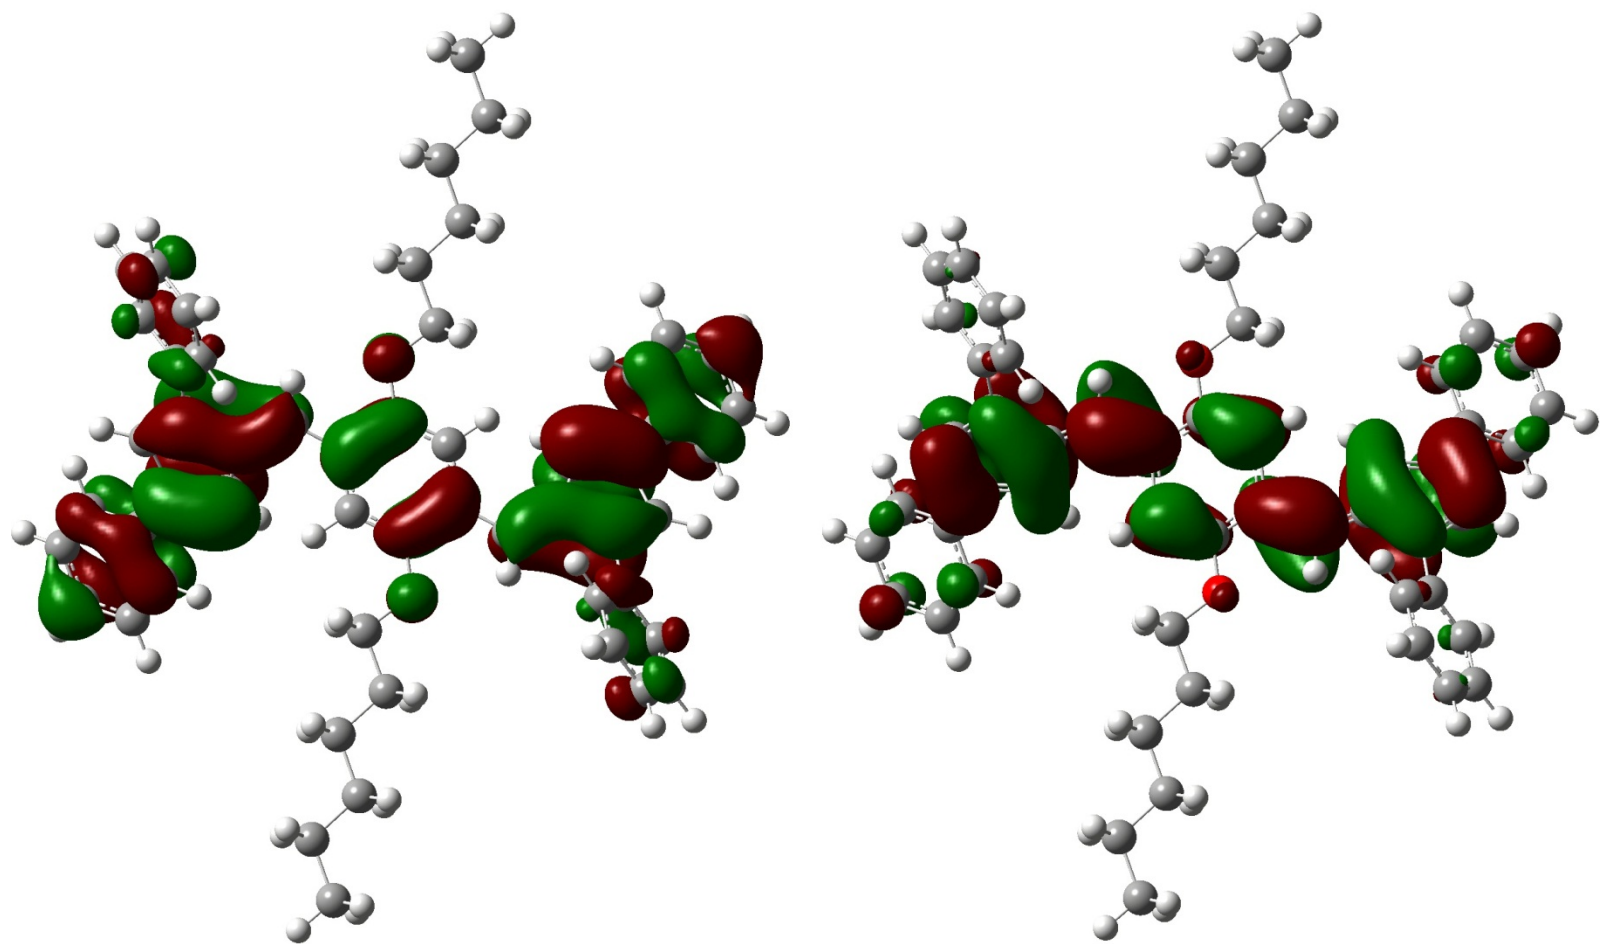

**Figure S19. HOMO (left) and LUMO (right) plots of bis(fulvene) 3.**

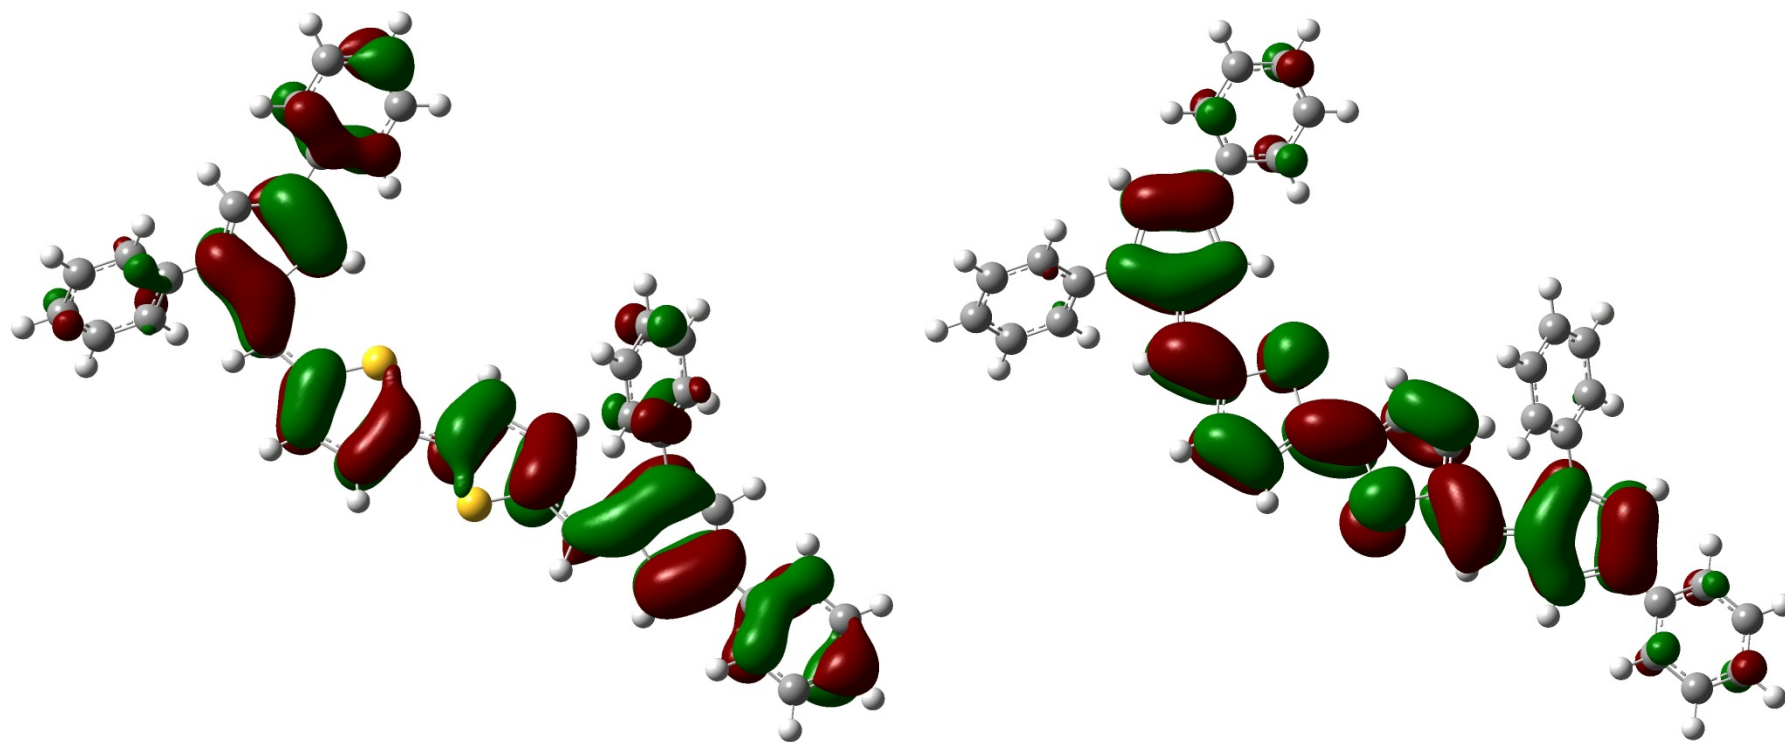

**Figure S20. HOMO (left) and LUMO (right) plots of bis(fulvene) 4.**



## References

1. a) Gerstel, P.; Klumpp, S.; Hennrich, F.; Poschlad, A.; Meded, V.; Blasco, E.; Wenzel, W.; Kappes, M.M.; Barner-Kowollik, C. *ACS Macro Lett.* **2014**, 3, 10. b) Pei, J.; Wen, S.; Zhou, Y.; Dong, Q.; Liu, Z.; Zhang, J.; Tian, W. *New J. Chem.* **2011**, 35, 385. c) Barik, S.; Friedland, S.; Skene, W.G. *Can. J. Chem.* **2010**, 88, 945.
2. Sarker, A.M.; Ding, L.; Lahti, P.M.; Karasz, F. *Macromolecules* **2002**, 35, 223.
3. Morin, J.; Drolet, N.; Tao, Y.; Leclerc, M. *Chem. Mater.* **2004**, 16, 4619.
4. Peloquin, A.J.; Stone, R.L.; Avila, S.E.; Rudico, E.R.; Horn, C.B.; Gardner, K.A.; Ball, D.W.; Johnson, J.E.B.; Iacono, S.T.; Balaich, G.J. *J. Org. Chem.* **2012**, 77, 6371.
5. APEX 2, SAINT and SADABS, Bruker **2013**, Bruker AXS Inc., Madison, Wisconsin, USA.
6. Sheldrick, G.M. *Acta Cryst.* **2008**, A64, 112.
7. Macrae, C.F.; Bruno, I.J.; Chisholm, J.A.; Edgington, P.R.; McCabe, P.; Pidcock, E.; Rodriguez-Monge, L.; Taylor, R.; van de Streek, J.; Wood, P.A. *J. Appl. Cryst.* **2008**, 41, 466.
8. Gaussian 09, Revision D.01, Frisch, M. J.; Trucks, G. W.; Schlegel, H. B.; Scuseria, G. E.; Robb, M. A.; Cheeseman, J. R.; Scalmani, G.; Barone, V.; Mennucci, B.; Petersson, G. A.; Nakatsuji, H.; Caricato, M.; Li, X.; Hratchian, H. P.; Izmaylov, A. F.; Bloino, J.; Zheng, G.; Sonnenberg, J. L.; Hada, M.; Ehara, M.; Toyota, K.; Fukuda, R.; Hasegawa, J.; Ishida, M.; Nakajima, T.; Honda, Y.; Kitao, O.; Nakai, H.; Vreven, T.; Montgomery, J. A., Jr.; Peralta, J. E.; Ogliaro, F.; Bearpark, M.; Heyd, J. J.; Brothers, E.; Kudin, K. N.; Staroverov, V. N.; Kobayashi, R.; Normand, J.; Raghavachari, K.; Rendell, A.; Burant, J. C.; Iyengar, S. S.; Tomasi, J.; Cossi, M.; Rega, N.; Millam, N. J.; Klene, M.; Knox, J. E.; Cross, J. B.; Bakken, V.; Adamo, C.; Jaramillo, J.; Gomperts, R.; Stratmann, R. E.; Yazyev, O.; Austin, A. J.; Cammi, R.; Pomelli, C.; Ochterski, J. W.; Martin, R. L.; Morokuma, K.; Zakrzewski, V. G.; Voth, G. A.; Salvador, P.; Dannenberg, J. J.; Dapprich, S.; Daniels, A. D.; Farkas, Ö.; Foresman, J. B.; Ortiz, J. V.; Cioslowski, J.; Fox, D. J. Gaussian, Inc., Wallingford CT, 2009.
9. GaussView, Version 5, Dennington, R.; Keith, T.; Millam, J. Semichem Inc., Shawnee Mission, KS, 2009.
10. Becke, A. D. *J. Chem. Phys.*, **1993**, 98, 5648.
11. Lee, C.; Yang, W.; Parr R. G. *Phys. Rev. B* **1988**, 37, 785.
12. a) McLean, A. D.; Chandler, G. S. *J. Chem. Phys.* **1980**, 72, 5639. b) Raghavachari, K.; Binkley, J. S.; Seeger, R.; Pople, J. A. *J. Chem. Phys.* **1980**, 72, 650.
